# Supplementary material for: Toward 30×30: Mapping in-situ Climate Refugia for Biodiversity Conservation across Mainland China
Source: Research Square preprint supplement (doi:10.21203/rs.3.rs-7035425/v1), 2025-07-18
Supplement: Supplementary file 1 [file dcf9c64fda2f42ee0aae8b5f.docx]

**Toward 30×30: Mapping in-situ Climate Refugia for Biodiversity Conservation across Mainland China**

Supplementary materials

1. **Parameters for threat intensity, distance decay, and habitat sensitivity in InVEST modelling**

| **Table S1**  Sensitivity of various land cover to threat factors. | | | | | | |
| --- | --- | --- | --- | --- | --- | --- |
| Land use type | Habitat quality | Threat Sensitivity | | | | |
| Paddy field | Dry land | Urban land | Rural settlements | Other construction land |
| Forest land | 1.0 | 0.5 | 0.7 | 0.9 | 0.8 | 0.8 |
|
| Shrub land | 0.8 | 0.5 | 0.7 | 0.9 | 0.7 | 0.8 |
|
| Open forest land | 0.8 | 0.6 | 0.7 | 0.9 | 0.7 | 0.8 |
|
| Other wooded land | 0.7 | 0.5 | 0.7 | 0.8 | 0.7 | 0.7 |
|
| High-coverage grassland | 0.8 | 0.5 | 0.7 | 0.7 | 0.5 | 0.6 |
|
| Medium-coverage grassland | 0.7 | 0.5 | 0.7 | 0.7 | 0.5 | 0.6 |
|
| Low-coverage grassland | 0.6 | 0.6 | 0.7 | 0.7 | 0.5 | 0.5 |
|
| Water area | 0.9 | 0.6 | 0.6 | 0.6 | 0.6 | 0.7 |
|
| Unused land | 0.3 | 0.3 | 0.4 | 0.6 | 0.5 | 0.5 |
|

| **Table S2**  Information of threats parameter. | | | |
| --- | --- | --- | --- |
| Threats | Maximum impact distance | Weight | Decay type |
| Paddy fields | 1 | 0.5 | Linear attenuation |
| Dry farmland | 1 | 0.5 | Linear attenuation |
| Urban land | 9 | 1.0 | Exponential Decay |
| Rural settlements | 6 | 0.7 | Exponential Decay |
| Other construction land | 6 | 0.7 | Exponential Decay |

1. **Key bioclimatic variables identified for four taxonomic groups**

| **Table S3** | | | | | |
| --- | --- | --- | --- | --- | --- |
| Key bioclimatic variables identified for Mammals. | | | | | |
| Species | Pearson correlation analysis（p<0.75） | | MaxEnt cumulative contribution rate analysis （≥90%） | | Bioclimatic variables |
| ***Ailuropoda Melanoleuca*** | BIO1, BIO2 | | BIO2 | | BIO1, BIO2,  BIO3, BIO4,  BIO7, BIO11,  BIO12, BIO13, BIO14, BIO15, BIO17 |
| ***Ailurus Fulgens*** | BIO1, BIO3, BIO7, BIO12,  BIO15, BIO17 | | BIO7, BIO12 | |
| ***Aonys Cinereus*** | BIO1, BIO4, BIO7, BIO15,  BIO18 | | BIO7, BIO4 | |
| ***Axis Porcinus*** | BIO1, BIO2, BIO4 | | BIO4 | |
| ***Cricetus Cricetus*** | BIO1, BIO2, BIO3, BIO11,  BIO17 | | BIO17, BIO11 | |
| ***Elephas Maximus*** | BIO1, BIO3, BIO7, BIO15 | | BIO3, BIO1, BIO7 | |
| ***Equus Ferus*** | BIO1, BIO5, BIO6, BIO8,  BIO9, BIO12, BIO13,  BIO15 | | BIO3, BIO1 | |
| ***Gazella Subgutturosa*** | BIO1, BIO2, BIO4, BIO11,  BIO12, BIO17 | BIO12, BIO11, BIO4 | |  | |
| ***Hydropotes Inermis*** | BIO1, BIO2, BIO4, BIO9,  BIO12, BIO14, BIO18 | BIO4, BIO14 | |
| ***Lutrogale Persicillata*** | BIO1, BIO3, BIO4, BIO7,  BIO12, BIO14 | BIO12, BIO3, BIO4 | |
| ***Manis Pentadactyla*** | BIO1, BIO2, BIO7, BIO12,  BIO18 | BIO12, BIO7 | |
| ***Naemorhedus Caudatus*** | BIO1, BIO3, BIO7, BIO11,  BIO13, BIO14, BIO15 | BIO7, BIO13, BIO14, BIO15 | |
| ***Ochotona Argentata*** | BIO1, BIO3, BIO15, BIO17 | BIO3, BIO17, BIO15 | |
| ***Ochotona Iliensis*** | BIO1, BIO2, BIO3, BIO14,  BIO15 | BIO3, BIO1, BIO2 | |
| ***Panthera Tigris*** | BIO1, BIO2, BIO6, BIO7,  BIO12, BIO15, BIO17 | BIO12, BIO17, BIO2 | |
| ***Panthera Uncia*** | BIO1, BIO3, BIO7, BIO12,  BIO15, BIO17 | BIO1 | |
| ***Pteropus Dasymallus*** | BIO1, BIO8 | BIO1 | |

**Note:** The 19 bioclimatic variables were derived from monthly temperature and precipitation data and obtained from the WorldClim database ([www.worldclim.org](http://www.worldclim.org)).

| **Table S4** | | | |
| --- | --- | --- | --- |
| Key bioclimatic variables identified for Amphibians. | | | |
| Species | Pearson correlation analysis（p<0.75） | MaxEnt cumulative contribution rate analysis （≥90%） | Bioclimatic variables |
| ***Amolops minutus*** | BIO1, BIO2, BIO7, BIO12,  BIO15 | BIO7, BIO12 | BIO1, BIO2,  BIO3, BIO4,  BIO6, BIO7,  BIO12, BIO13, BIO14, BIO15,  BIO17, BIO18,  BIO19 |
| ***Batrachuperus karlschmidti*** | BIO1, BIO2, BIO4, BIO7,  BIO12, BIO14 | BIO12 |
| ***Echinotriton chinhaiensis*** | BIO1, BIO2, BIO8, BIO14 | BIO14, BIO2, BIO1 |
| ***Gracixalus sapaensis*** | BIO1, BIO4, BIO15 | BIO4 |
| ***Hynobius maoershanensis*** | BIO1, BIO3, BIO13, BIO14,  BIO17 | BIO17, BIO3 |
| ***Megophrys cheni*** | BIO1, BIO2, BIO3 | BIO2, BIO1 |
| ***Megophrys fansipanensis*** | BIO1, BIO2, BIO7, BIO12,  BIO15, BIO17 | BIO7, BIO12 |  |
| ***Megophrys hoanglienensis*** | BIO1, BIO3, BIO7, BIO14,  BIO19 | BIO7, BIO3, BIO19 |
| ***Nidirana hainanensis*** | BIO1, BIO2, BIO12, BIO15,  BIO16, BIO18, BIO19 | BIO1, BIO18 |  |
| ***Pachytriton airobranchiatus*** | BIO1, BIO3 | BIO1 |
| ***Pachytriton feii*** | BIO1, BIO2, BIO8, BIO13,  BIO14 | BIO14, BIO1 |
| ***Pachytriton moi*** | BIO1, BIO2, BIO3, BIO13,  BIO14, BIO15, BIO19 | BIO14 |
| ***Pachytriton wuguanfui*** | BIO1, BIO2, BIO13, BIO14,  BIO15 | BIO14 |
| ***Pachytriton xanthospilos*** | BIO1, BIO3 | BIO1, BIO3 |
| ***Pelophylax tenggerensis*** | BIO1, BIO2, BIO6, BIO12,  BIO13 | BIO6, BIO12, BIO13 |
| ***Rana asiatica*** | BIO1, BIO3, BIO14 | BIO1, BIO3, BIO14 |
| ***Ranodon sibiricus*** | BIO1, BIO3, BIO7, BIO17 | BIO17, BIO1 |  |
| ***Scutiger maculatus*** | BIO1, BIO2, BIO4, BIO12,  BIO14, BIO15 | BIO12, BIO14 |  |
| ***Tylototriton hainanensis*** | BIO1, BIO2, BIO15 | BIO2, BIO15, BIO1 |  |
| ***Tylototriton pseudoverrucosus*** | BIO1, BIO2, BIO3, BIO13,  BIO14, BIO17 | BIO3, BIO14, BIO13, BIO17 |  |
| ***Zhangixalus dorsoviridis*** | BIO1, BIO3, BIO7, BIO12,  BIO14, BIO15 | BIO3, BIO12 |  |
| ***Zhangixalus duboisi*** | BIO1, BIO7, BIO12, BIO19 | BIO7, BIO12, BIO19 |  |
| ***Zhangixalus yinggelingensis*** | BIO1, BIO3, BIO12, BIO18 | BIO12, BIO3 |  |

**Note:** The 19 bioclimatic variables were derived from monthly temperature and precipitation data and obtained from the WorldClim database ([www.worldclim.org](http://www.worldclim.org)).

| **Table S5** | | | |
| --- | --- | --- | --- |
| Key bioclimatic variables identified for Reptiles. | | | |
| Species | Pearson correlation analysis（p<0.75） | MaxEnt cumulative contribution rate analysis （≥90%） | Bioclimatic variables |
| ***Caretta caretta*** | BIO1, BIO2, BIO12, BIO13 | BIO2 | BIO1, BIO2,  BIO12, BIO14,  BIO19 |
| ***Dermochelys coriacea*** | BIO1, BIO2, BIO5, BIO12, BIO13, BIO15 | BIO2 |
| ***Eretmochelys imbricata*** | BIO1, BIO2, BIO5, BIO12, BIO13 | BIO2 |
| ***Lepidochelys olivacea*** | BIO1, BIO2, BIO5, BIO12, BIO13 | BIO2 |
| ***Pelochelys cantorii*** | BIO1, BIO2, BIO3, BIO13, BIO15, BIO19 | BIO19, BIO2, BIO1 |
| ***Platysternon megacephalum*** | BIO1, BIO2, BIO4, BIO8, BIO12, BIO15, BIO18 | BIO12 |
| ***Rafetus swinhoei*** | BIO1, BIO2, BIO5, BIO12, BIO13, BIO14 | BIO14, BIO12 |

| **Table S6** | | | |
| --- | --- | --- | --- |
| Key bioclimatic variables identified for Birds. | | | |
| Species | Pearson correlation analysis（p<0.75） | MaxEnt cumulative contribution rate analysis （≥90%） | Bioclimatic variables |
| ***Aceros nipalensis*** | BIO1, BIO15 | BIO1, BIO15 | BIO1, BIO2, BIO3, BIO4, BIO7, BIO12,  BIO13, BIO14, BIO15, BIO16,  BIO17, BIO19 |
| ***Arborophila ardens*** | BIO1, BIO2, BIO3, BIO4,  BIO12 | BIO4, BIO2 |
| ***Arborophila rufipectus*** | BIO1, BIO2, BIO14 | BIO14 |
| ***Buceros bicornis*** | BIO1, BIO3, BIO4, BIO7,  BIO12, BIO14 | BIO12, BIO3 |
| ***Clanga clanga*** | BIO1, BIO3, BIO7, BIO12,  BIO15 | BIO3, BIO7, BIO1, BIO15, BIO12 |
| ***Corvus pectoralis*** | BIO1, BIO3, BIO7, BIO8,  BIO12, BIO13 | BIO13, BIO1, BIO7 |
| ***Falco vespertinus*** | BIO1, BIO12, BIO19 | BIO19, BIO1 |  |
| ***Grus antigone*** | BIO1, BIO2, BIO15 | BIO2, BIO1 |
| ***Gyps bengalensis*** | BIO1, BIO2, BIO3, BIO7,  BIO15, BIO19 | BIO3, BIO7 |
| ***Halcyon pileata*** | BIO1, BIO3, BIO7, BIO12,  BIO15 | BIO12, BIO7, BIO1 |
| ***Ianthocincla bieti*** | BIO1, BIO4, BIO12, BIO15 | BIO12, BIO4 |
| ***Liocichla omeiensis*** | BIO1, BIO3 | BIO1 |
| ***Lophophorus lhuysii*** | BIO1, BIO2, BIO12, BIO14,  BIO15 | BIO12 |
| ***Mulleripicus pulverulentus*** | BIO1, BIO2, BIO4, BIO17 | BIO4, BIO17 |
| ***Nipponia nippon*** | BIO1, BIO3, BIO12 | BIO12, BIO3 |  |
| ***Oroanassa magnifica*** | BIO1, BIO2, BIO4, BIO8,  BIO12, BIO15 | BIO12 |
| ***Pavo muticus*** | BIO1, BIO3, BIO4, BIO7,  BIO12, BIO14, BIO15 | BIO3, BIO14 |
| ***Phylloscopus hainanus*** | BIO1, BIO2, BIO3, BIO4,  BIO12 | BIO4, BIO3 |
| ***Polyplectron katsumatae*** | BIO1, BIO2, BIO3, BIO4,  BIO12 | BIO4 |
| ***Saxicola insignis*** | BIO1, BIO2, BIO14 | BIO1, BIO14 |
| ***Sitta formosa*** | BIO1, BIO2, BIO3, BIO14,  BIO15 | BIO3, BIO14 |
| ***Sitta magna*** | BIO1, BIO3, BIO7, BIO12,  BIO14, BIO16 | BIO3, BIO14 |
| ***Spelaeornis kinneari*** | BIO1, BIO3, BIO14,  BIO19 | BIO3, BIO19 |
| ***Stachyris nonggangensis*** | BIO1, BIO12, BIO16 | BIO12, BIO16, BIO1 |  |
| ***Sterna acuticauda*** | BIO1, BIO3, BIO7, BIO12,  BIO17 | BIO3, BIO12 |  |
| ***Suthora zappeyi*** | BIO1, BIO4, BIO12, BIO15 | BIO12 |  |
| ***Syrmaticus humiae*** | BIO1, BIO3, BIO7, BIO12,  BIO15, BIO17 | BIO17, BIO3 |  |
| ***Syrmaticus reevesii*** | BIO1, BIO3, BIO4, BIO6,  BIO12,  BIO14, BIO15, BIO18 | BIO12, BIO4, BIO14 |  |
| ***Tragopan blythii*** | BIO1, BIO3, BIO7, BIO14,  BIO15 | BIO3, BIO14, BIO7 |  |
| ***Tragopan caboti*** | BIO1, BIO3, BIO7, BIO8,  BIO12,  BIO14 | BIO14 |  |
| **Note:** The 19 bioclimatic variables were derived from monthly temperature and precipitation data and obtained from the WorldClim database ([www.worldclim.org](http://www.worldclim.org)). | | | |

1. **Climate niche widths (CNWs) for four taxonomic groups.**

| **Table S7** | | | |
| --- | --- | --- | --- |
| Threat categories, primary habitat type and climatic niche width of mammals. | | | |
| Species | Degree of endangerment | Habitat type | Climatic niche width |
| ***Ailuropoda melanoleuca*** | Vulnerable | Forest Land | 1.00 |
| ***Ailurus fulgens*** | Endangered | Forest Land | 1.69 |
| ***Aonyx cinereus*** | Vulnerable | Water Area | 5.15 |
| ***Arctictis binturong*** | Vulnerable | Forest Land | 4.30 |
| ***Arctonyx collaris*** | Vulnerable | Forest Land | 1.52 |
| ***Axis porcinus*** | Endangered | Forest Land | 1.16 |
| ***Bos gaurus*** | Vulnerable | Forest Land | 2.99 |
| ***Bos javanicus*** | Critical Endangered | Forest Land | 1.05 |
| ***Bos mutus*** | Vulnerable | Grass Land | 0.89 |
| ***Budorcas taxicolor*** | Vulnerable | Forest Land | 1.91 |
| ***Camelus ferus*** | Critical Endangered | Unused Land | 0.38 |
| ***Capricornis rubidus*** | Vulnerable | Forest Land | 1.34 |
| ***Capricornis sumatraensis*** | Vulnerable | Forest Land | 2.34 |
| ***Cervus albirostris*** | Vulnerable | Forest Land | 1.28 |
| ***Chrotogale owstoni*** | Endangered | Forest Land | 1.16 |
| ***Cricetus cricetus*** | Critical Endangered | Grass Land | 0.80 |
| ***Cuon alpinus*** | Endangered | Forest Land | 2.47 |
| ***Elephas maximus*** | Endangered | Forest Land | 1.83 |
| ***Equus ferus*** | Endangered | Grass Land | 0.25 |
| ***Felis bieti*** | Vulnerable | Grass Land | 1.62 |
| ***Gazella subgutturosa*** | Vulnerable | Grass Land | 1.47 |
| ***Helarctos malayanus*** | Vulnerable | Forest Land | 2.21 |
| ***Hoolock hoolock*** | Endangered | Forest Land | 1.54 |
| ***Hoolock tianxing*** | Endangered | Forest Land | 1.29 |
| ***Hydropotes inermis*** | Vulnerable | Forest Land | 0.74 |
| ***Hylobates lar*** | Endangered | Forest Land | 0.65 |
| ***Lepus hainanus*** | Endangered | Grass Land | 0.25 |
| ***Lutrogale perspicillata*** | Vulnerable | Water Area | 1.64 |
| ***Macaca arctoides*** | Vulnerable | Forest Land | 3.25 |
| ***Macaca leonina*** | Vulnerable | Forest Land | 2.44 |
| ***Macaca leucogenys*** | Endangered | Forest Land | 1.86 |
| ***Macaca munzala*** | Endangered | Forest Land | 1.31 |
| ***Manis javanica*** | Critical Endangered | Forest Land | 0.88 |
| ***Manis pentadactyla*** | Critical Endangered | Forest Land | 3.34 |
| ***Marmota sibirica*** | Endangered | Grass Land | 0.68 |
| ***Moschus anhuiensis*** | Endangered | Forest Land | 0.59 |
| ***Moschus berezovskii*** | Endangered | Forest Land | 2.04 |
| ***Moschus chrysogaster*** | Endangered | Forest Land | 1.68 |
| ***Moschus fuscus*** | Endangered | Forest Land | 1.84 |
| ***Moschus leucogaster*** | Endangered | Forest Land | 2.24 |
| ***Moschus moschiferus*** | Vulnerable | Forest Land | 0.71 |
| ***Muntiacus crinifrons*** | Vulnerable | Forest Land | 1.15 |
| ***Myotis pilosus*** | Vulnerable | Forest Land | 2.53 |
| ***Naemorhedus baileyi*** | Vulnerable | Forest Land | 1.47 |
| ***Naemorhedus caudatus*** | Vulnerable | Forest Land | 0.44 |
| ***Neofelis nebulosa*** | Vulnerable | Forest Land | 2.63 |
| ***Neohylomys hainanensis*** | Endangered | Forest Land | 0.70 |
| ***Nomascus concolor*** | Critical Endangered | Forest Land | 0.79 |
| ***Nomascus hainanus*** | Critical Endangered | Forest Land | 0.38 |
| ***Nomascus leucogenys*** | Critical Endangered | Forest Land | 0.98 |
| ***Nomascus nasutus*** | Critical Endangered | Forest Land | 0.52 |
| ***Nycticebus bengalensis*** | Endangered | Forest Land | 3.34 |
| ***Nycticebus pygmaeus*** | Endangered | Forest Land | 0.93 |
| ***Ochotona argentata*** | Endangered | Unused Land | 0.27 |
| ***Ochotona iliensis*** | Endangered | Unused Land | 1.20 |
| ***Ochotona koslowi*** | Endangered | Unused Land | 0.30 |
| ***Panthera pardus*** | Vulnerable | Forest Land | 1.84 |
| ***Panthera tigris*** | Endangered | Forest Land | 1.59 |
| ***Panthera uncia*** | Vulnerable | Unused Land | 1.88 |
| ***Procapra przewalskii*** | Endangered | Grass Land | 0.19 |
| ***Proedromys bedfordi*** | Vulnerable | Forest Land | 0.44 |
| ***Pteropus lylei*** | Vulnerable | Forest Land | 0.34 |
| ***Rhinolophus rex*** | Endangered | Forest Land | 2.72 |
| ***Rhinopithecus bieti*** | Endangered | Forest Land | 0.88 |
| ***Rhinopithecus brelichi*** | Critical Endangered | Forest Land | 0.41 |
| ***Rhinopithecus roxellana*** | Endangered | Forest Land | 1.17 |
| ***Rucervus eldii*** | Endangered | Unused Land | 0.52 |
| ***Rusa unicolor*** | Vulnerable | Forest Land | 2.95 |
| ***Tadarida latouchei*** | Endangered | Forest Land | 0.37 |
| ***Trachypithecus crepusculus*** | Endangered | Forest Land | 0.94 |
| ***Trachypithecus francoisi*** | Endangered | Forest Land | 0.98 |
| ***Trachypithecus leucocephalus*** | Critical Endangered | Unused Land | 0.37 |
| ***Trachypithecus pileatus*** | Vulnerable | Forest Land | 2.27 |
| ***Trachypithecus shortridgei*** | Endangered | Forest Land | 1.17 |
| ***Ursus thibetanus*** | Vulnerable | Forest Land | 2.04 |
| ***Viverra megaspila*** | Endangered | Forest Land | 1.62 |
| ***Vormela peregusna*** | Vulnerable | Grass Land | 1.53 |

| **Table S8** | | | |
| --- | --- | --- | --- |
| Threat categories, primary habitat type and climatic niche width of Amphibians. | | | |
| Species | Degree of endangerment | Habitat type | Climatic niche width |
| ***Amolops albispinus*** | Vulnerable | Forest Land | 0.82 |
| ***Amolops hainanensis*** | Endangered | Forest Land | 1.02 |
| ***Amolops hongkongensis*** | Endangered | Forest Land | 0.31 |
| ***Amolops loloensis*** | Vulnerable | Forest Land | 2.15 |
| ***Amolops medogensis*** | Endangered | Forest Land | 1.54 |
| ***Amolops minutus*** | Endangered | Forest Land | 0.49 |
| ***Amolops monticola*** | Endangered | Forest Land | 1.53 |
| ***Amolops ottorum*** | Endangered | Forest Land | 0.29 |
| Amolops splendissimus | Vulnerable | Forest Land | 0.47 |
| Amolops torrentis | Vulnerable | Forest Land | 0.83 |
| ***A***molops tuberodepressus | Vulnerable | Forest Land | 0.73 |
| Andrias davidianus | Critical Endangered | Water Area | 1.37 |
| Andrias sligoi | Critical Endangered | Water Area | 1.30 |
| Batrachuperus karlschmidti | Vulnerable | Water Area | 0.78 |
| Batrachuperus londongensis | Endangered | Water Area | 1.41 |
| Batrachuperus pinchonii | Vulnerable | Water Area | 1.67 |
| Batrachuperus tibetanus | Vulnerable | Water Area | 0.98 |
| Batrachuperus yenyuanensis | Endangered | Water Area | 1.19 |
| Bombina fortinuptialis | Vulnerable | Water Area | 0.59 |
| Bombina lichuanensis | Vulnerable | Water Area | 0.31 |
| Buergeria oxycephala | Vulnerable | Forest Land | 0.99 |
| Bufo aspinius | Endangered | Forest Land | 0.56 |
| Bufo luchunnicus | Critical Endangered | Forest Land | 0.13 |
| ***Bufo tuberospinius*** | Critical Endangered | Forest Land | 0.26 |
| Echinotriton chinhaiensis | Critical Endangered | Forest Land | 0.18 |
| Glandirana minima | Endangered | Forest Land | 0.90 |
| Gracixalus jinggangensis | Critical Endangered | Forest Land | 0.21 |
| Gracixalus nonggangensis | Endangered | Forest Land | 0.35 |
| Gracixalus sapaensis | Endangered | Forest Land | 0.65 |
| Hylarana spinulosa | Vulnerable | Forest Land | 1.00 |
| Hynobius amjiensis | Endangered | Water Area | 0.43 |
| Hynobius guabangshanensis | Critical Endangered | Water Area | 0.13 |
| Hynobius maoershanensis | Critical Endangered | Water Area | 0.14 |
| Hypselotriton chenggongensis | Critical Endangered | Water Area | 0.12 |
| Hypselotriton cyanurus | Vulnerable | Water Area | 0.49 |
| ***Hypselotriton fudingensis*** | Critical Endangered | Water Area | 0.58 |
| ***Hypselotriton glaucus*** | Critical Endangered | Water Area | 0.30 |
| Hypselotriton orphicus | Endangered | Water Area | 0.12 |
| ***Hypselotriton yunnanensis*** | Vulnerable | Water Area | 0.92 |
| Leptobrachella bourreti | Vulnerable | Forest Land | 0.69 |
| Leptobrachella laui | Vulnerable | Forest Land | 0.41 |
| Leptobrachella pluvialis | Endangered | Forest Land | 0.43 |
| Leptobrachella tengchongensis | Endangered | Forest Land | 0.41 |
| Leptobrachium boringii | Endangered | Forest Land | 1.65 |
| Leptobrachium guangxiense | Vulnerable | Forest Land | 0.44 |
| Leptobrachium hainanense | Vulnerable | Forest Land | 1.05 |
| Leptobrachium leishanense | Endangered | Forest Land | 0.40 |
| Leptobrachium promustache | Endangered | Forest Land | 0.68 |
| ***Leptobrachium tengchongense*** | Endangered | Forest Land | 0.65 |
| Limnonectes fragilis | Vulnerable | Water Area | 0.84 |
| ***Limnonectes quangninhensis*** | Vulnerable | Water Area | 0.46 |
| Liua tsinpaensis | Vulnerable | Water Area | 0.37 |
| Liuixalus hainanus | Vulnerable | Forest Land | 1.08 |
| Liuixalus ocellatus | Vulnerable | Forest Land | 0.95 |
| Liuixalus romeri | Endangered | Forest Land | 0.46 |
| Liurana xizangensis | Vulnerable | Forest Land | 1.11 |
| Megophrys acuta | Critical Endangered | Forest Land | 0.27 |
| Megophrys baolongensis | Critical Endangered | Forest Land | 0.25 |
| Megophrys binchuanensis | Vulnerable | Forest Land | 0.91 |
| Megophrys binlingensis | Vulnerable | Forest Land | 0.05 |
| Megophrys brachykolos | Endangered | Forest Land | 0.43 |
| Megophrys caudoprocta | Endangered | Forest Land | 0.35 |
| Megophrys cheni | Vulnerable | Forest Land | 0.38 |
| ***Megophrys fansipanensis*** | Endangered | Forest Land | 0.56 |
| ***Megophrys hoanglienensis*** | Endangered | Forest Land | 0.56 |
| Megophrys lini | Endangered | Forest Land | 0.60 |
| Megophrys medogensis | Endangered | Forest Land | 1.48 |
| Megophrys nankiangensis | Vulnerable | Forest Land | 0.51 |
| Megophrys obesa | Critical Endangered | Forest Land | 0.24 |
| Megophrys rubrimera | Endangered | Forest Land | 0.52 |
| Megophrys sangzhiensis | Critical Endangered | Forest Land | 0.13 |
| Megophrys tuberogranulata | Endangered | Forest Land | 0.29 |
| Microhyla beilunensis | Critical Endangered | Water Area | 0.21 |
| Nanorana kangxianensis | Endangered | Water Area | 0.28 |
| Nanorana maculosa | Vulnerable | Water Area | 0.80 |
| Nanorana medogensis | Endangered | Water Area | 1.66 |
| Nanorana sichuanensis | Vulnerable | Water Area | 2.00 |
| Nanorana unculuanus | Vulnerable | Water Area | 0.89 |
| ***Nanorana yunnanensis*** | Vulnerable | Water Area | 2.59 |
| Nasutixalus yingjiangensis | Endangered | Forest Land | 0.57 |
| Nidirana hainanensis | Critical Endangered | Water Area | 0.11 |
| Odorrana anlungensis | Endangered | Forest Land | 0.35 |
| Odorrana cangyuanensis | Endangered | Forest Land | 0.48 |
| Odorrana geminata | Vulnerable | Forest Land | 0.14 |
| Odorrana grahami | Vulnerable | Forest Land | 2.19 |
| Odorrana hainanensis | Vulnerable | Forest Land | 0.84 |
| Odorrana hejiangensis | Vulnerable | Forest Land | 0.99 |
| Odorrana jingdongensis | Vulnerable | Forest Land | 1.05 |
| Odorrana kuangwuensis | Vulnerable | Forest Land | 0.45 |
| Odorrana kweichowensis | Vulnerable | Forest Land | 0.56 |
| Odorrana lipuensis | Vulnerable | Forest Land | 2.13 |
| Odorrana wuchuanensis | Vulnerable | Forest Land | 0.19 |
| Oreolalax chuanbeiensis | Endangered | Forest Land | 0.98 |
| Oreolalax jingdongensis | Vulnerable | Forest Land | 0.67 |
| Oreolalax liangbeiensis | Critical Endangered | Forest Land | 0.16 |
| Oreolalax multipunctatus | Endangered | Forest Land | 1.23 |
| Oreolalax nanjiangensis | Vulnerable | Forest Land | 0.59 |
| Oreolalax omeimontis | Endangered | Forest Land | 0.55 |
| Oreolalax pingii | Endangered | Forest Land | 0.48 |
| Oreolalax puxiongensis | Endangered | Forest Land | 0.77 |
| Oreolalax rhodostigmatus | Vulnerable | Forest Land | 1.19 |
| Pachyhynobius shangchengensis | Vulnerable | Forest Land | 0.44 |
| Pachytriton airobranchiatus | Critical Endangered | Water Area | 0.42 |
| ***Pachytriton changi*** | Endangered | Forest Land | 0.71 |
| Pachytriton feii | Vulnerable | Forest Land | 0.70 |
| Pachytriton moi | Endangered | Forest Land | 0.47 |
| Pachytriton wuguanfui | Endangered | Forest Land | 0.39 |
| Pachytriton xanthospilos | Critical Endangered | Forest Land | 0.54 |
| Paramesotriton aurantius | Vulnerable | Water Area | 0.51 |
| Paramesotriton fuzhongensis | Vulnerable | Water Area | 0.67 |
| Paramesotriton guangxiensis | Vulnerable | Water Area | 0.54 |
| Paramesotriton labiatus | Critical Endangered | Water Area | 0.16 |
| Paramesotriton longliensis | Vulnerable | Water Area | 0.30 |
| Paramesotriton qixilingensis | Vulnerable | Water Area | 0.19 |
| Paramesotriton yunwuensis | Endangered | Water Area | 0.20 |
| Paramesotriton zhijinensis | Endangered | Water Area | 0.12 |
| Parapelophryne scalpta | Vulnerable | Forest Land | 0.71 |
| Pelophylax chosenicus | Vulnerable | Water Area | 0.18 |
| Pelophylax tenggerensis | Endangered | Water Area | 0.17 |
| Pseudohynobius flavomaculatus | Vulnerable | Forest Land | 0.33 |
| ***Pseudohynobius jinfo*** | Endangered | Forest Land | 0.19 |
| Pseudohynobius kuankuoshuiensis | Critical Endangered | Forest Land | 0.14 |
| Pseudohynobius puxiongensis | Critical Endangered | Forest Land | 0.24 |
| Pseudohynobius shuichengensis | Critical Endangered | Forest Land | 0.06 |
| Quasipaa acanthophora | Vulnerable | Forest Land | 0.18 |
| Quasipaa boulengeri | Vulnerable | Forest Land | 1.86 |
| Quasipaa jiulongensis | Vulnerable | Forest Land | 1.08 |
| Quasipaa shini | Endangered | Forest Land | 1.82 |
| Quasipaa spinosa | Vulnerable | Forest Land | 1.30 |
| Quasipaa yei | Vulnerable | Forest Land | 0.70 |
| Rana asiatica | Vulnerable | Forest Land | 1.15 |
| Rana chevronta | Critical Endangered | Forest Land | 0.26 |
| Ranodon sibiricus | Endangered | Water Area | 0.64 |
| ***Rhacophorus vanbanicus*** | Vulnerable | Forest Land | 0.83 |
| Scutiger chintingensis | Vulnerable | Forest Land | 1.25 |
| Scutiger jiulongensis | Endangered | Forest Land | 1.33 |
| Scutiger liupanensis | Endangered | Forest Land | 0.32 |
| Scutiger maculatus | Critical Endangered | Forest Land | 0.72 |
| Scutiger muliensis | Endangered | Forest Land | 0.79 |
| Scutiger pingwuensis | Endangered | Forest Land | 0.67 |
| Scutiger spinosus | Critical Endangered | Forest Land | 0.51 |
| Scutiger tuberculatus | Vulnerable | Forest Land | 1.02 |
| Scutiger wanglangensis | Vulnerable | Forest Land | 0.69 |
| ***Tylototriton anhuiensis*** | Critical Endangered | Forest Land | 0.18 |
| Tylototriton broadoridgus | Vulnerable | Forest Land | 0.79 |
| ***Tylototriton dabienicus*** | Endangered | Forest Land | 0.38 |
| Tylototriton hainanensis | Endangered | Forest Land | 0.38 |
| Tylototriton kweichowensis | Vulnerable | Forest Land | 0.82 |
| ***Tylototriton liuyangensis*** | Endangered | Forest Land | 0.55 |
| Tylototriton pseudoverrucosus | Endangered | Forest Land | 0.90 |
| Tylototriton shanjing | Vulnerable | Forest Land | 1.57 |
| Tylototriton taliangensis | Vulnerable | Forest Land | 1.41 |
| Tylototriton vietnamensis | Vulnerable | Forest Land | 1.07 |
| Tylototriton wenxianensis | Vulnerable | Forest Land | 0.99 |
| Tylototriton yangi | Endangered | Forest Land | 0.87 |
| Tylototriton ziegleri | Vulnerable | Forest Land | 0.88 |
| ***Zhangixalus dorsoviridis*** | Vulnerable | Forest Land | 0.62 |
| Zhangixalus duboisi | Vulnerable | Forest Land | 1.30 |
| ***Zhangixalus hongchibaensis*** | Endangered | Forest Land | 0.16 |
| Zhangixalus hungfuensis | Endangered | Forest Land | 0.99 |
| ***Zhangixalus wui*** | Vulnerable | Forest Land | 0.09 |
| Zhangixalus yinggelingensis | Vulnerable | Forest Land | 0.44 |
|  |  |  |  |

| **Table S9** | | | |
| --- | --- | --- | --- |
| Threat categories, primary habitat type and climatic niche width of reptiles. | | | |
| Species | Degree of endangerment | Habitat type | Climatic niche width |
| ***Achalinus hainanus*** | Vulnerable | Forest Land | 0.42 |
| ***Alligator sinensis*** | Critical Endangered | Water Area | 0.36 |
| ***Caretta caretta*** | Vulnerable | Water Area | 1.49 |
| ***Chelonia mydas*** | Endangered | Water Area | 1.05 |
| ***Cuora galbinifrons*** | Critical Endangered | Forest Land | 0.60 |
| ***Cuora mouhotii*** | Endangered | Forest Land | 2.98 |
| ***Cuora trifasciata*** | Critical Endangered | Forest Land | 1.28 |
| ***Deinagkistrodon acutus*** | Vulnerable | Forest Land | 2.07 |
| ***Dermochelys coriacea*** | Vulnerable | Water Area | 1.15 |
| ***Elaphe moellendorffi*** | Vulnerable | Forest Land | 2.26 |
| ***Elaphe taeniura*** | Vulnerable | Forest Land | 1.11 |
| ***Eretmochelys imbricata*** | Critical Endangered | Water Area | 0.74 |
| ***Euprepiophis perlacea*** | Endangered | Forest Land | 1.11 |
| ***Gekko swinhonis*** | Vulnerable | Forest Land | 0.81 |
| ***Geoemyda spengleri*** | Endangered | Forest Land | 0.81 |
| ***Goniurosaurus araneus*** | Endangered | Forest Land | 0.17 |
| ***Goniurosaurus bawanglingensis*** | Endangered | Forest Land | 0.20 |
| ***Goniurosaurus liboensis*** | Endangered | Forest Land | 0.13 |
| ***Goniurosaurus luii*** | Vulnerable | Forest Land | 0.34 |
| ***Goniurosaurus zhelongi*** | Endangered | Forest Land | 0.50 |
| ***Indotestudo elongata*** | Critical Endangered | Forest Land | 2.20 |
| ***Indotyphlops lazelli*** | Critical Endangered | Forest Land | 0.25 |
| ***Lepidochelys olivacea*** | Vulnerable | Water Area | 0.74 |
| ***Manouria impressa*** | Endangered | Forest Land | 1.53 |
| ***Mauremys mutica*** | Critical Endangered | Forest Land | 1.01 |
| ***Mauremys sinensis*** | Critical Endangered | Forest Land | 1.33 |
| ***Naja atra*** | Vulnerable | Forest Land | 2.00 |
| ***Oligodon lacroixi*** | Vulnerable | Forest Land | 0.35 |
| ***Ophiophagus hannah*** | Vulnerable | Forest Land | 3.23 |
| ***Palea steindachneri*** | Critical Endangered | Forest Land | 1.51 |
| ***Pelochelys cantorii*** | Critical Endangered | Water Area | 1.65 |
| ***Physignathus cocincinus*** | Vulnerable | Forest Land | 2.38 |
| ***Platysternon megacephalum*** | Critical Endangered | Forest Land | 1.51 |
| ***Protobothrops mangshanensis*** | Endangered | Forest Land | 0.34 |
| ***Protobothrops trungkhanhensis*** | Endangered | Forest Land | 0.12 |
| ***Python bivittatus*** | Vulnerable | Forest Land | 3.15 |
| ***Rafetus swinhoei*** | Critical Endangered | Water Area | 0.64 |
| ***Sacalia quadriocellata*** | Critical Endangered | Forest Land | 0.69 |
| ***Scincella huanrenensis*** | Critical Endangered | Forest Land | 0.17 |
| ***Shinisaurus crocodilurus*** | Endangered | Water Area | 0.49 |
| ***Thermophis zhaoermii*** | Endangered | Forest Land | 0.65 |
| ***Trachischium guentheri*** | Vulnerable | Forest Land | 0.52 |
|  |  |  |  |

| **Table S10** | | | |
| --- | --- | --- | --- |
| Threat categories, primary habitat type and climatic niche width of birds. | | | |
| Species | Degree of endangerment | Habitat type | Climatic niche width |
| ***Aceros nipalensis*** | Vulnerable | Forest Land | 3.71 |
| ***Arborophila ardens*** | Vulnerable | Forest Land | 1.25 |
| ***Arborophila rufipectus*** | Vulnerable | Forest Land | 1.03 |
| ***Buceros bicornis*** | Vulnerable | Forest Land | 1.59 |
| ***Clanga clanga*** | Vulnerable | Forest Land | 0.95 |
| ***Corvus pectoralis*** | Vulnerable | Forest Land | 1.28 |
| ***Falco vespertinus*** | Vulnerable | Grass Land | 0.78 |
| ***Grus antigone*** | Vulnerable | Unused Land | 2.94 |
| ***Gyps bengalensis*** | Critical Endangered | Grass Land | 2.30 |
| ***Halcyon pileata*** | Vulnerable | Water Area | 1.44 |
| ***Ianthocincla bieti*** | Vulnerable | Forest Land | 1.17 |
| ***Liocichla omeiensis*** | Vulnerable | Forest Land | 1.24 |
| ***Lophophorus lhuysii*** | Vulnerable | Forest Land | 0.71 |
| ***Mulleripicus pulverulentus*** | Vulnerable | Forest Land | 3.28 |
| ***Nipponia nippon*** | Endangered | Unused Land | 0.29 |
| ***Oroanassa magnifica*** | Endangered | Forest Land | 2.81 |
| ***Pavo muticus*** | Endangered | Forest Land | 2.04 |
| ***Phylloscopus hainanus*** | Vulnerable | Forest Land | 1.24 |
| ***Polyplectron katsumatae*** | Endangered | Forest Land | 0.83 |
| ***Saxicola insignis*** | Vulnerable | Grass Land | 1.47 |
| ***Sitta formosa*** | Vulnerable | Forest Land | 3.92 |
| ***Sitta magna*** | Endangered | Forest Land | 1.73 |
| ***Spelaeornis kinneari*** | Vulnerable | Forest Land | 0.76 |
| ***Stachyris nonggangensis*** | Vulnerable | Forest Land | 1.09 |
| ***Sterna acuticauda*** | Endangered | Water Area | 1.02 |
| ***Suthora zappeyi*** | Vulnerable | Forest Land | 1.11 |
| ***Syrmaticus humiae*** | Vulnerable | Forest Land | 1.72 |
| ***Syrmaticus reevesii*** | Vulnerable | Forest Land | 1.69 |
| ***Tragopan blythii*** | Vulnerable | Forest Land | 2.51 |
| ***Tragopan caboti*** | Vulnerable | Forest Land | 1.80 |
|  |  |  |  |

1. **The results of climate stability, habitat suitability and habitat quality**


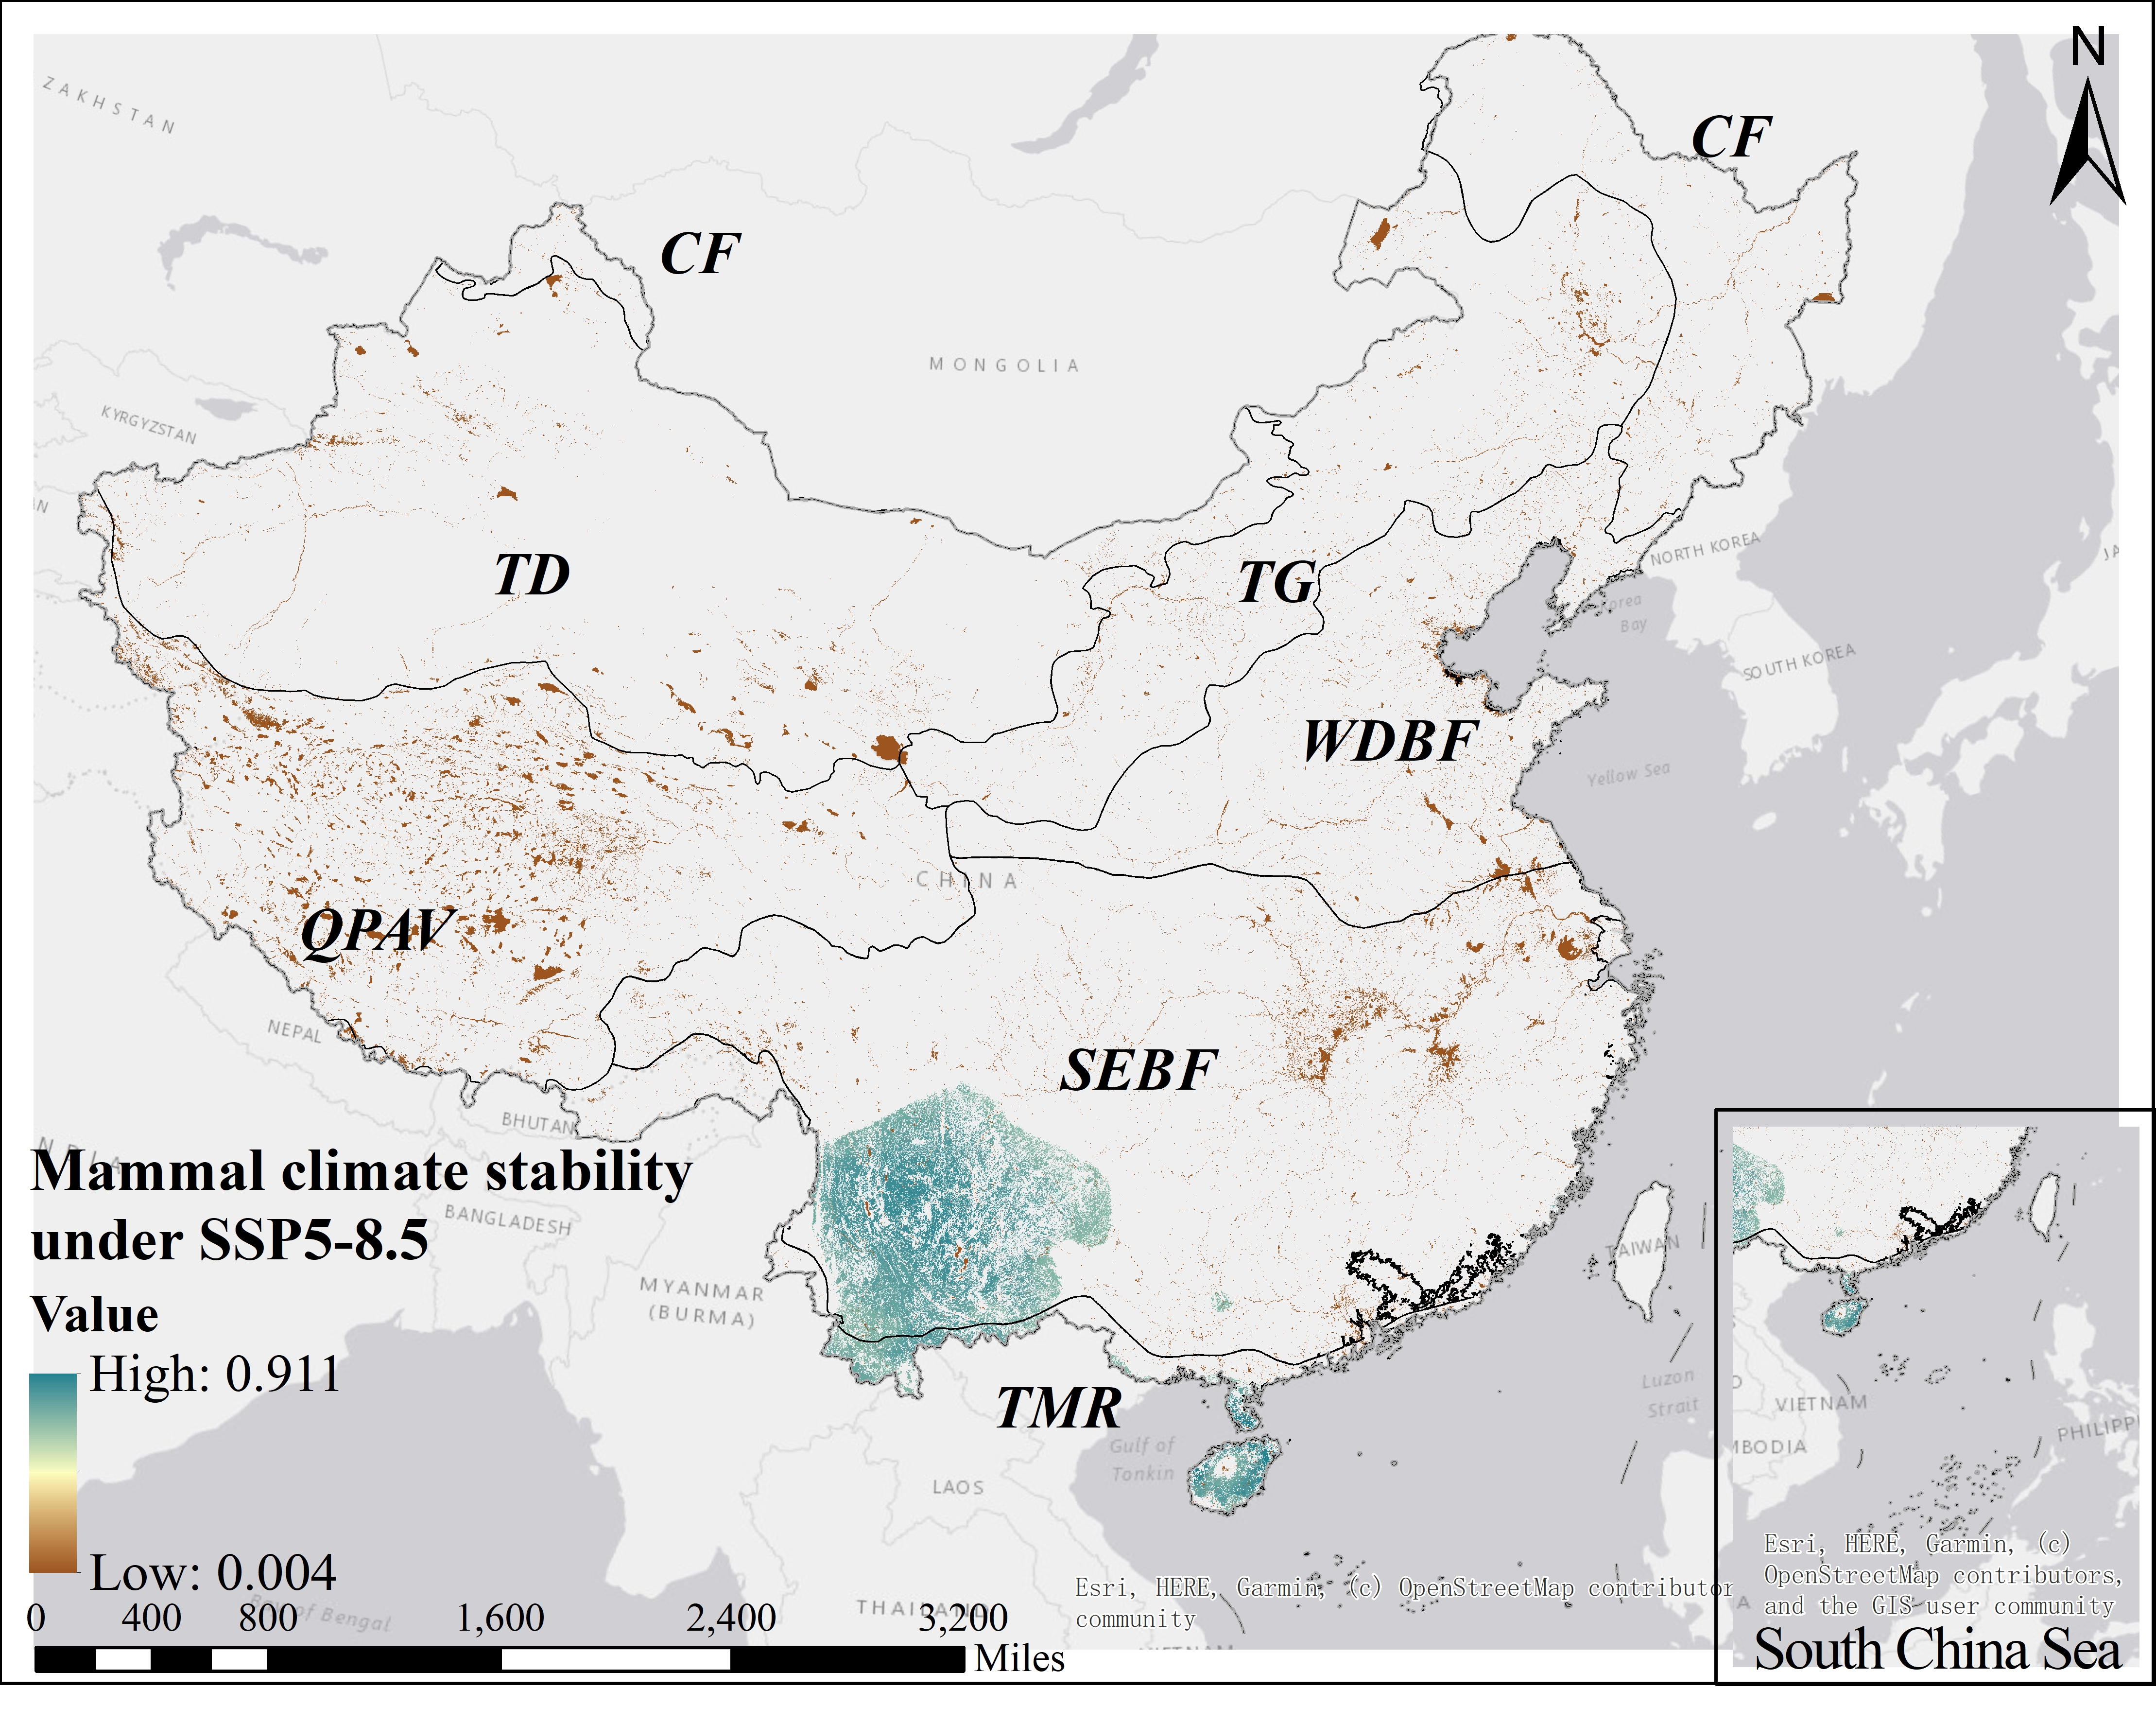

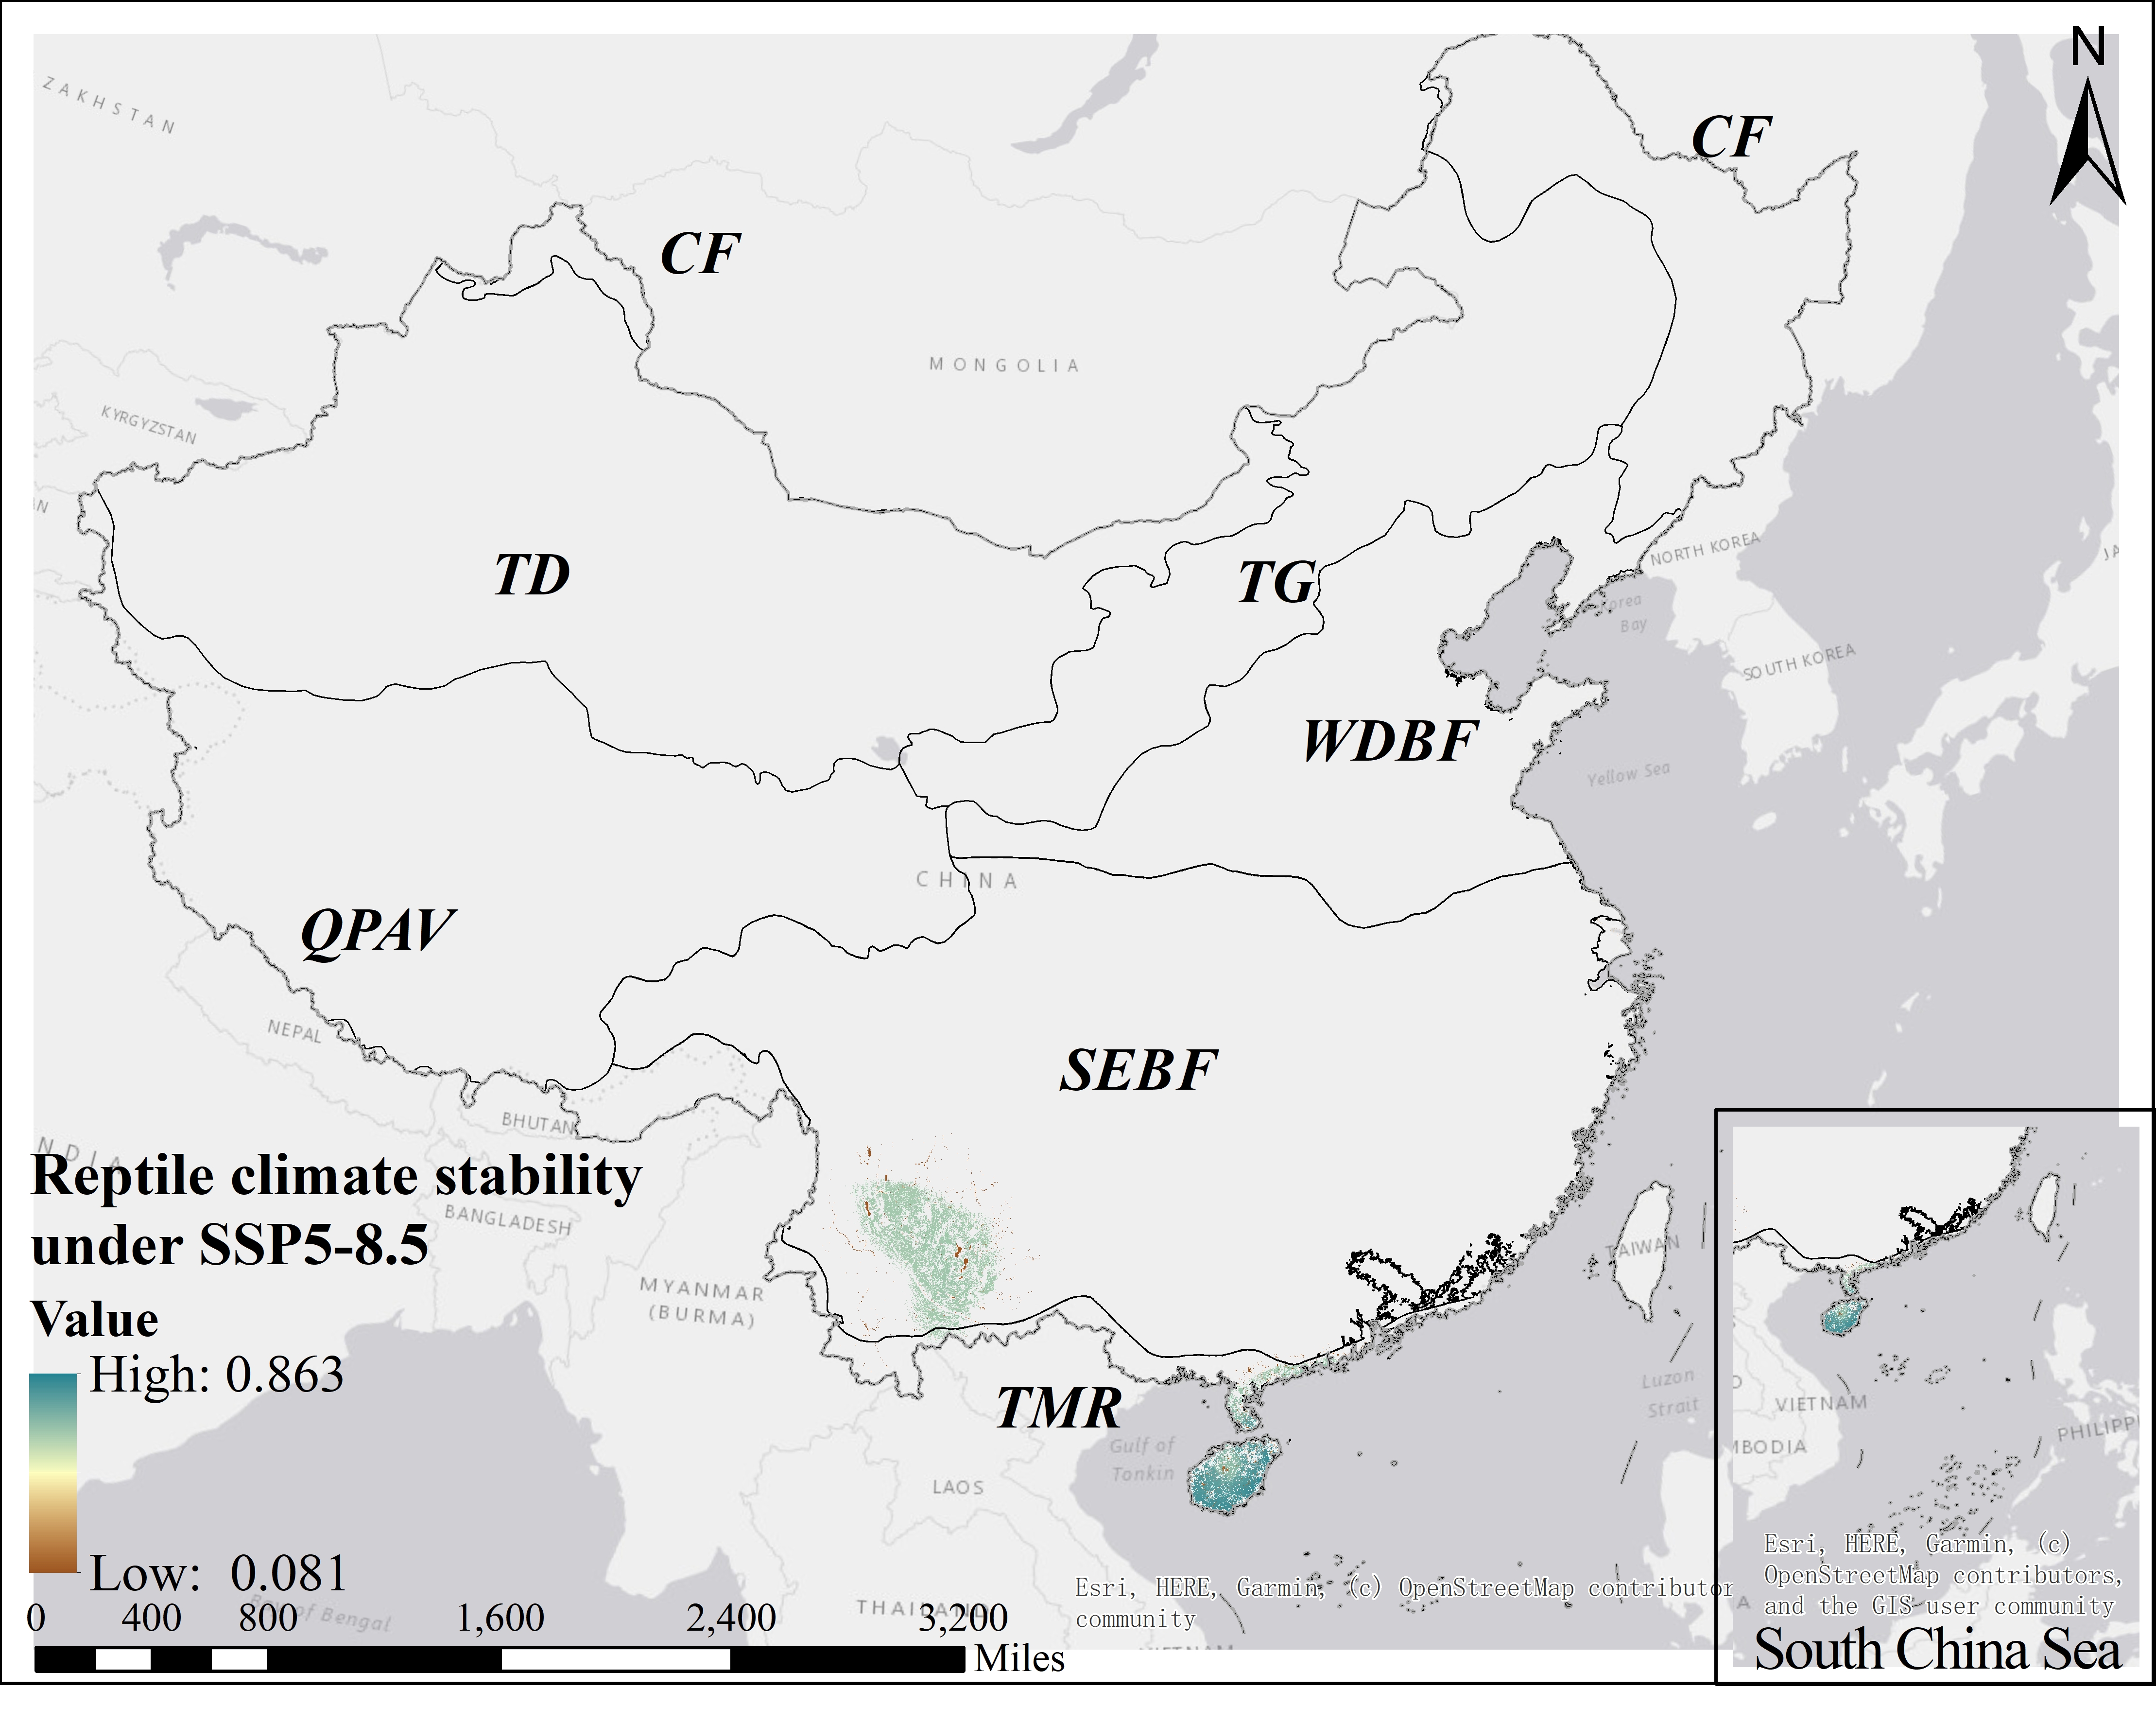


(b)

(a)


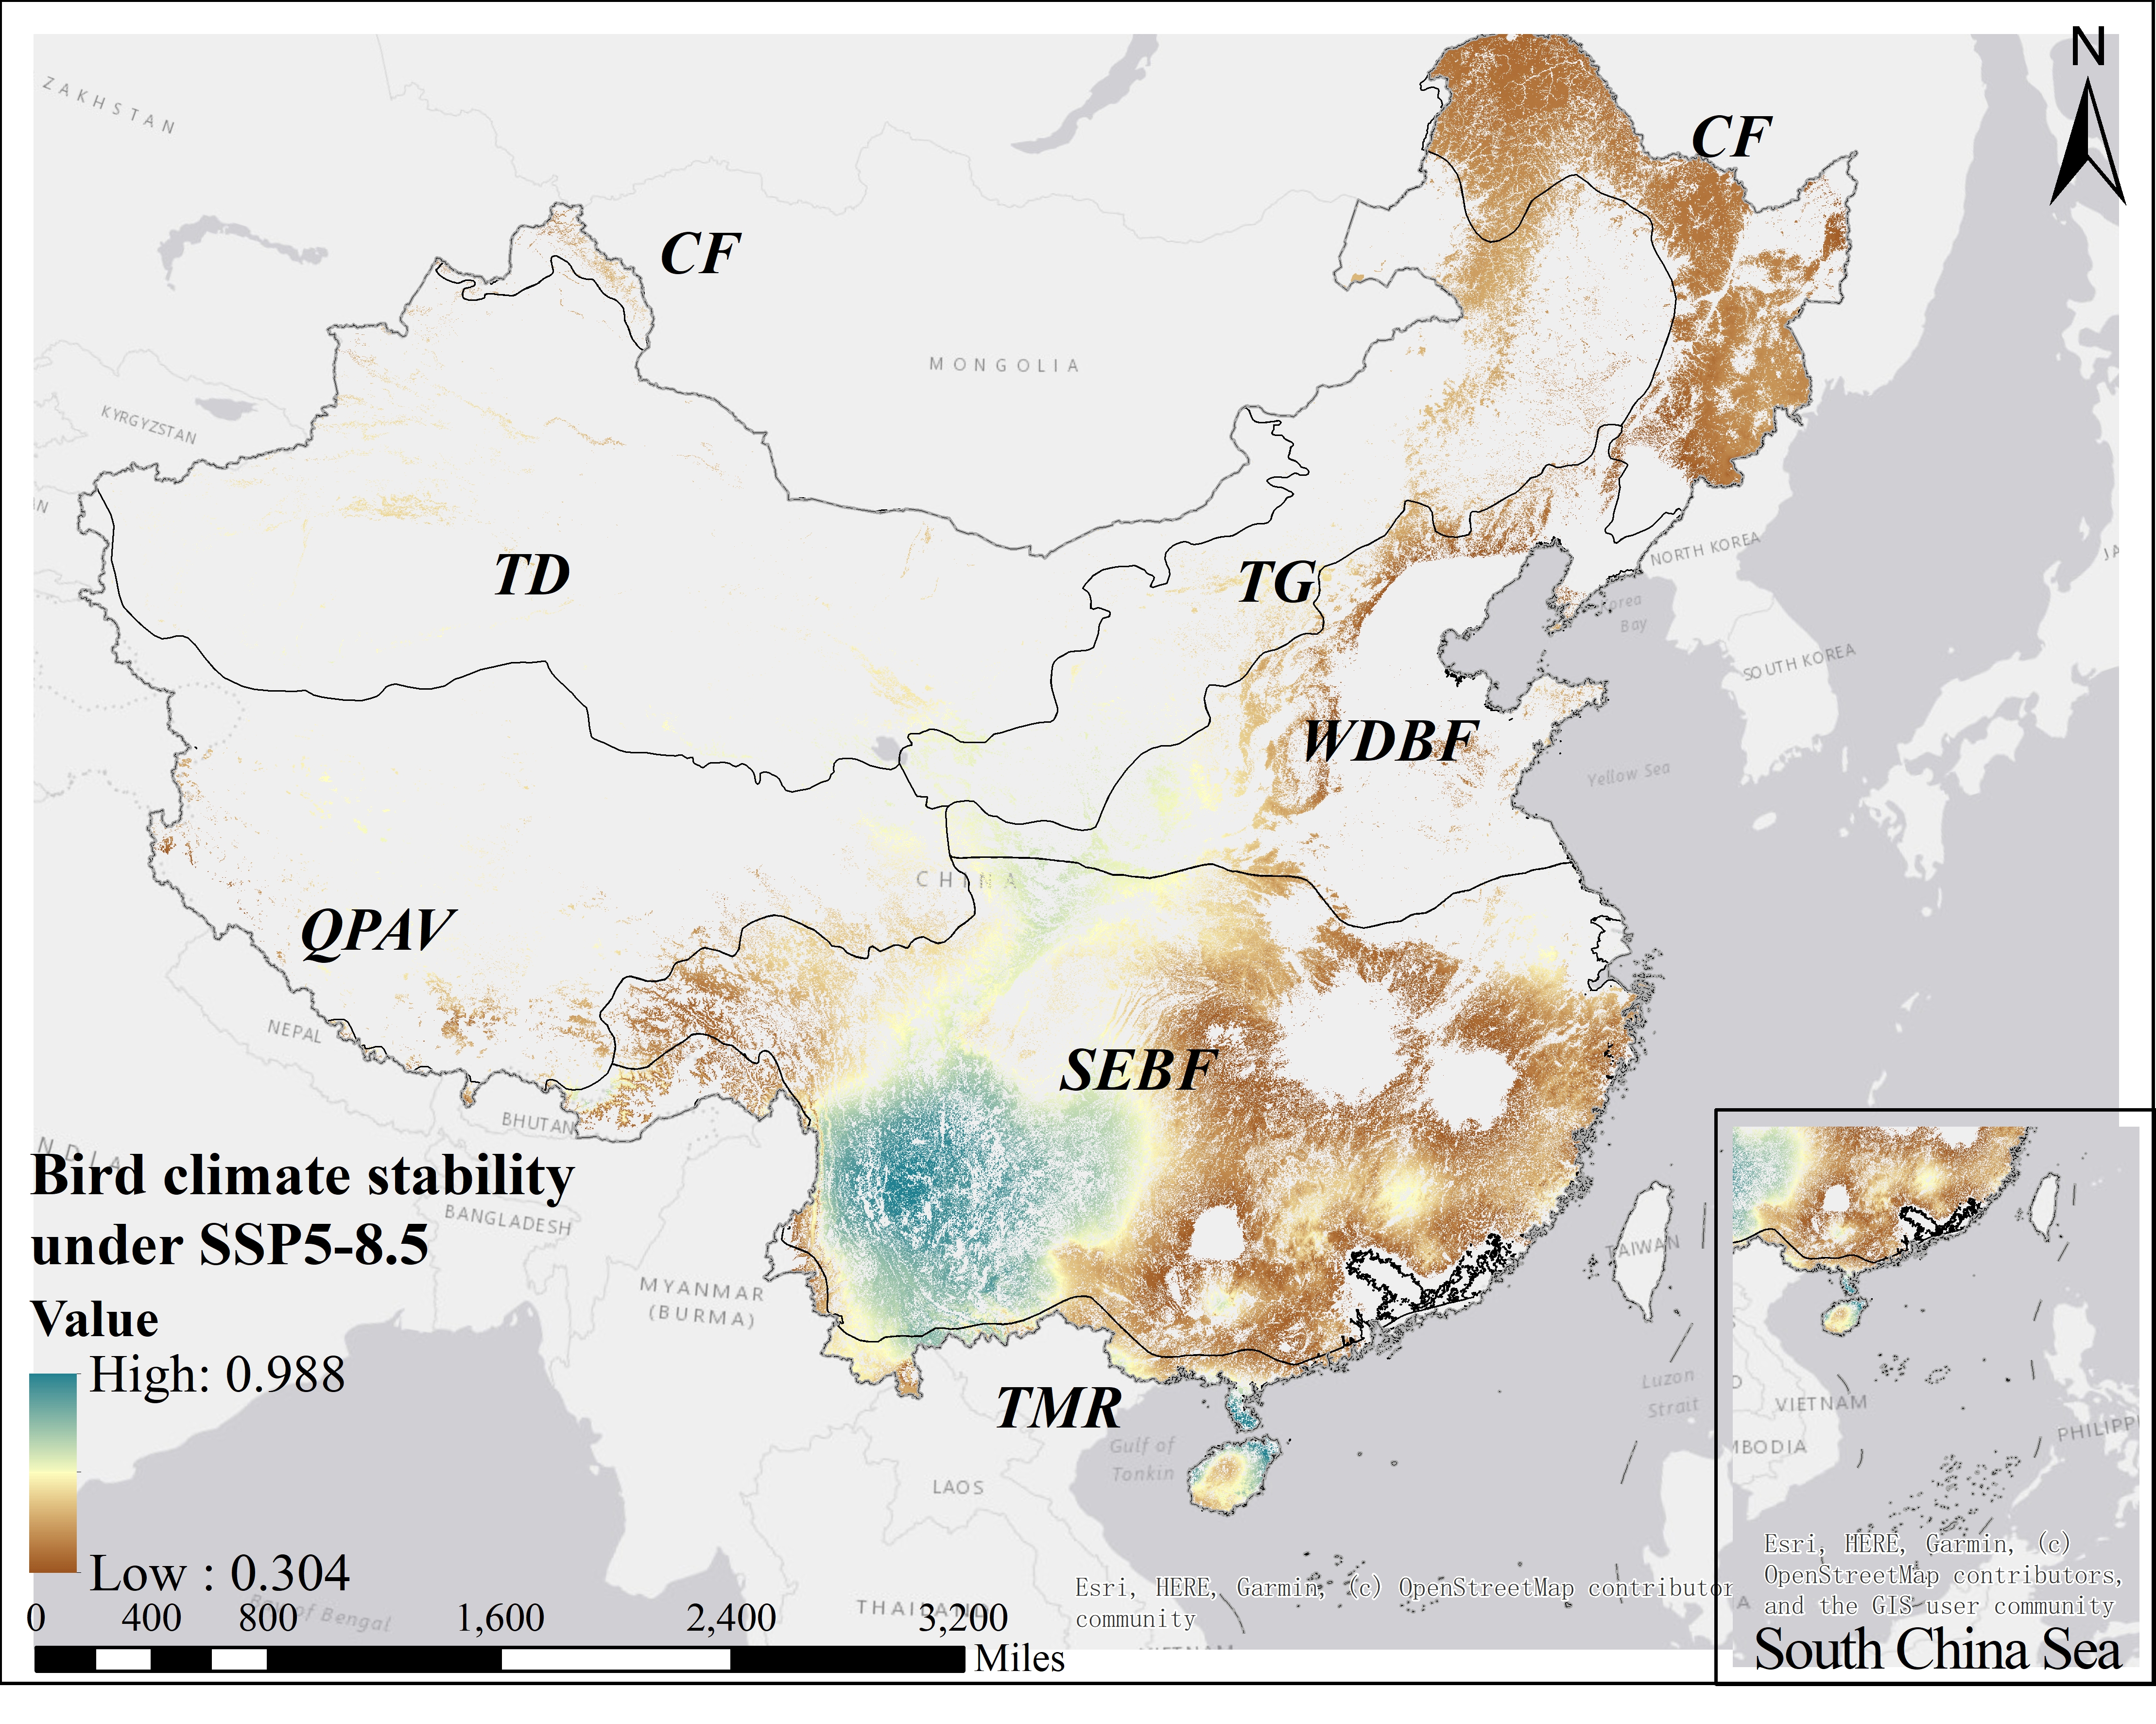


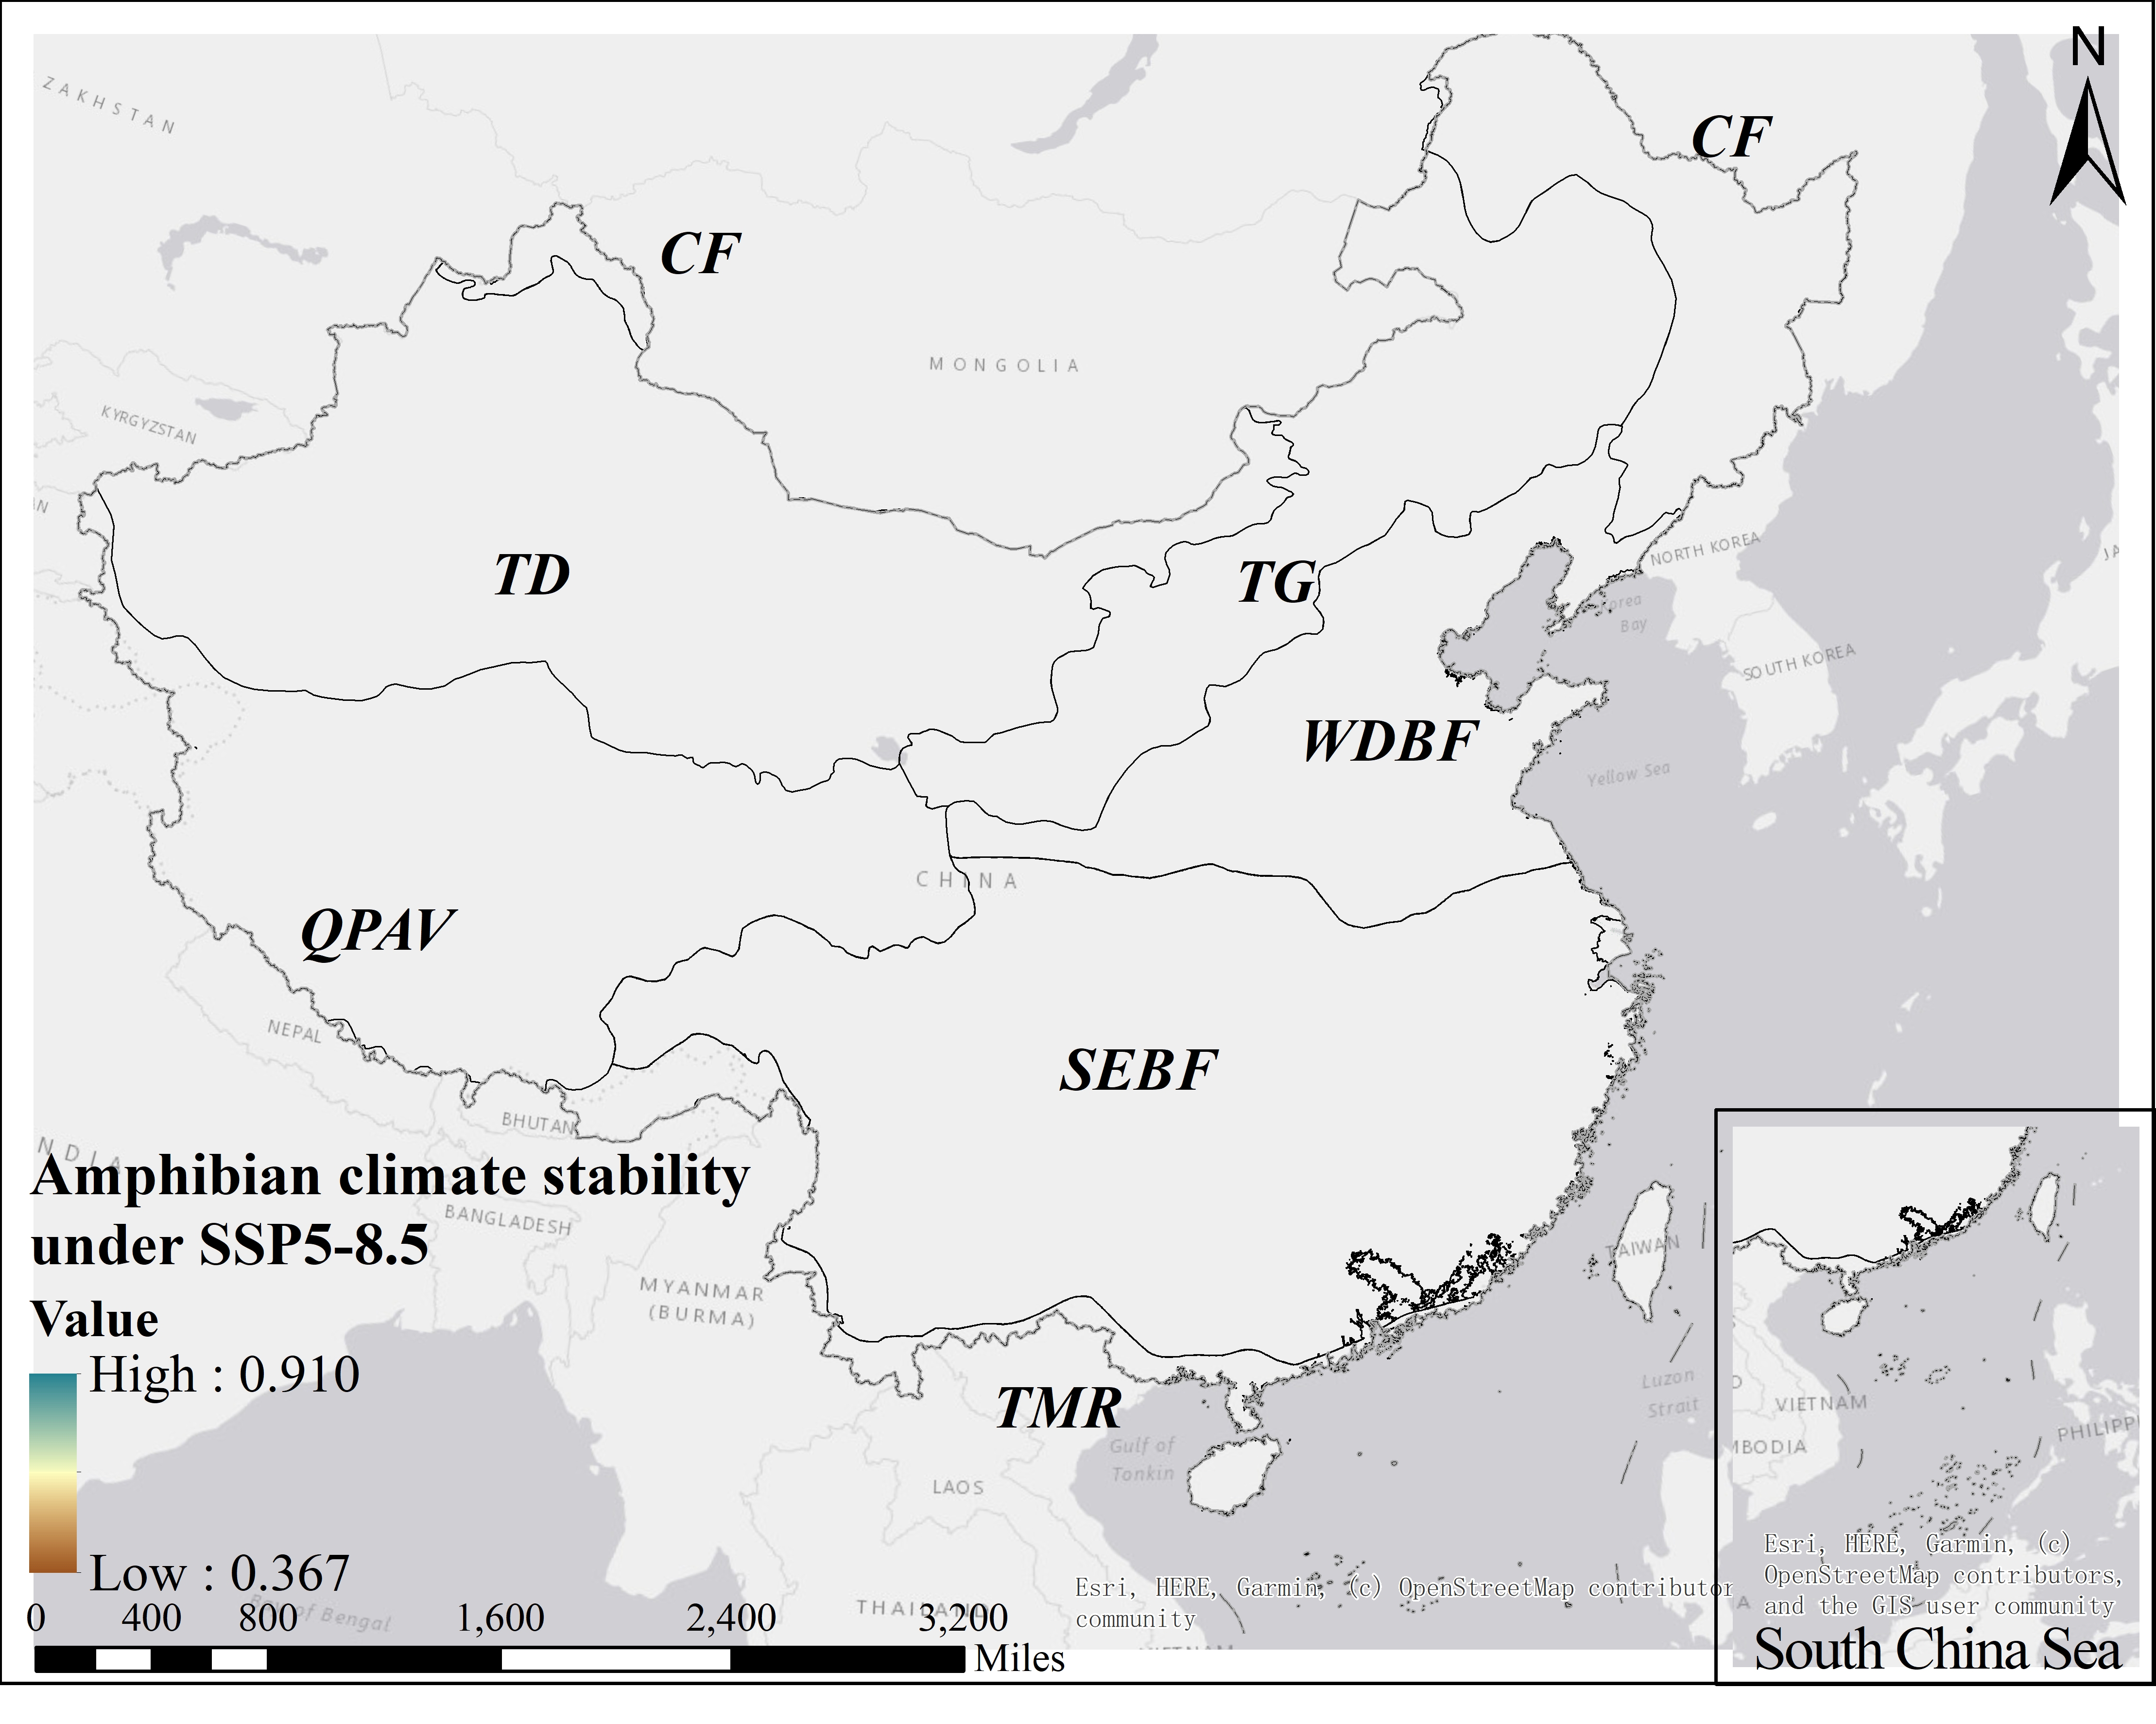


(d)

(c)

**Fig. S1.** Spatial patterns of climate stability for four taxa—a. mammals, b. reptiles, c. non-migratory birds, and d. amphibians—in China under the SSP5–8.5 scenario. A higher value indicates stronger climatic stability. Biomes: TMF—tropical monsoon forest, TCDBF—temperate coniferous & deciduous broadleaf forest, WDBF—warm-temperate deciduous broadleaf forest, CF—cold-temperate coniferous forest, SEBF—subtropical evergreen broadleaf forest, TD—temperate desert, TG—temperate grassland.


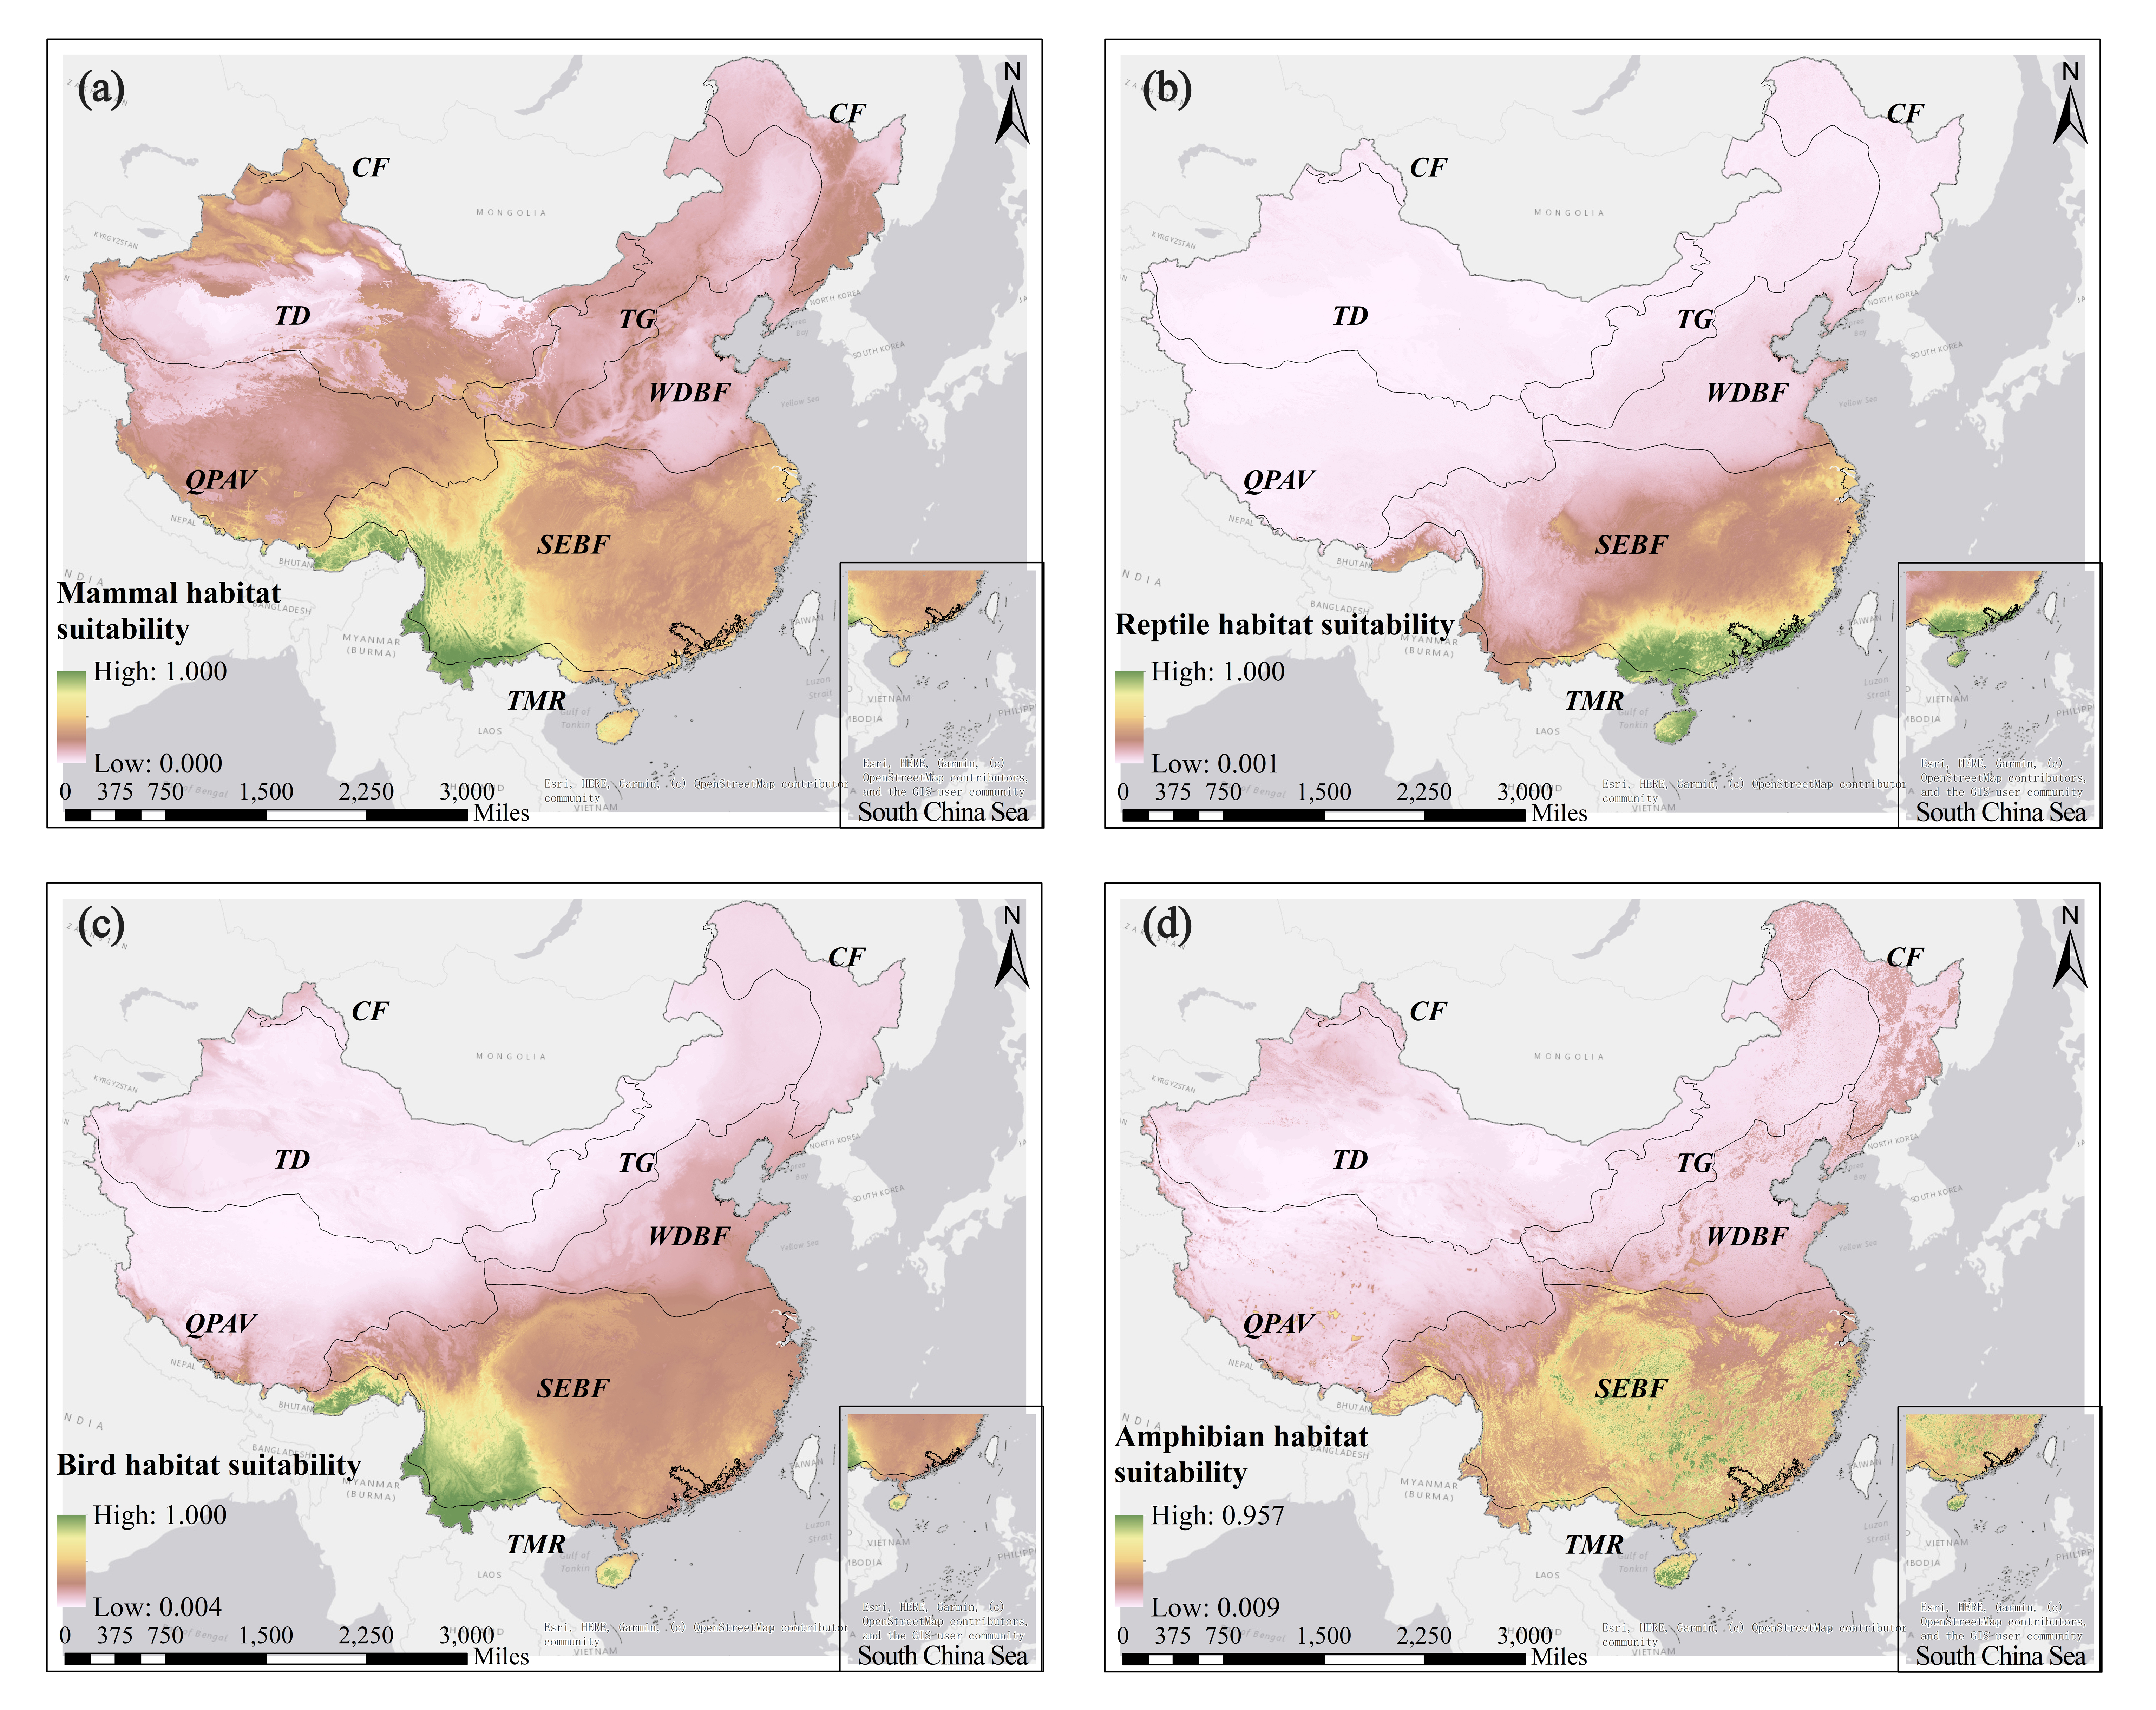


**Fig. S2.** Spatial patterns of habitat suitability (HS) for four taxa (mammals, reptiles, non-migratory birds, and amphibians) in China. Biomes: TMF—tropical monsoon forest, TCDBF—temperate coniferous & deciduous broadleaf forest, WDBF—warm-temperate deciduous broadleaf forest, CF—cold-temperate coniferous forest, SEBF—subtropical evergreen broadleaf forest, TD—temperate desert, TG—temperate grassland.


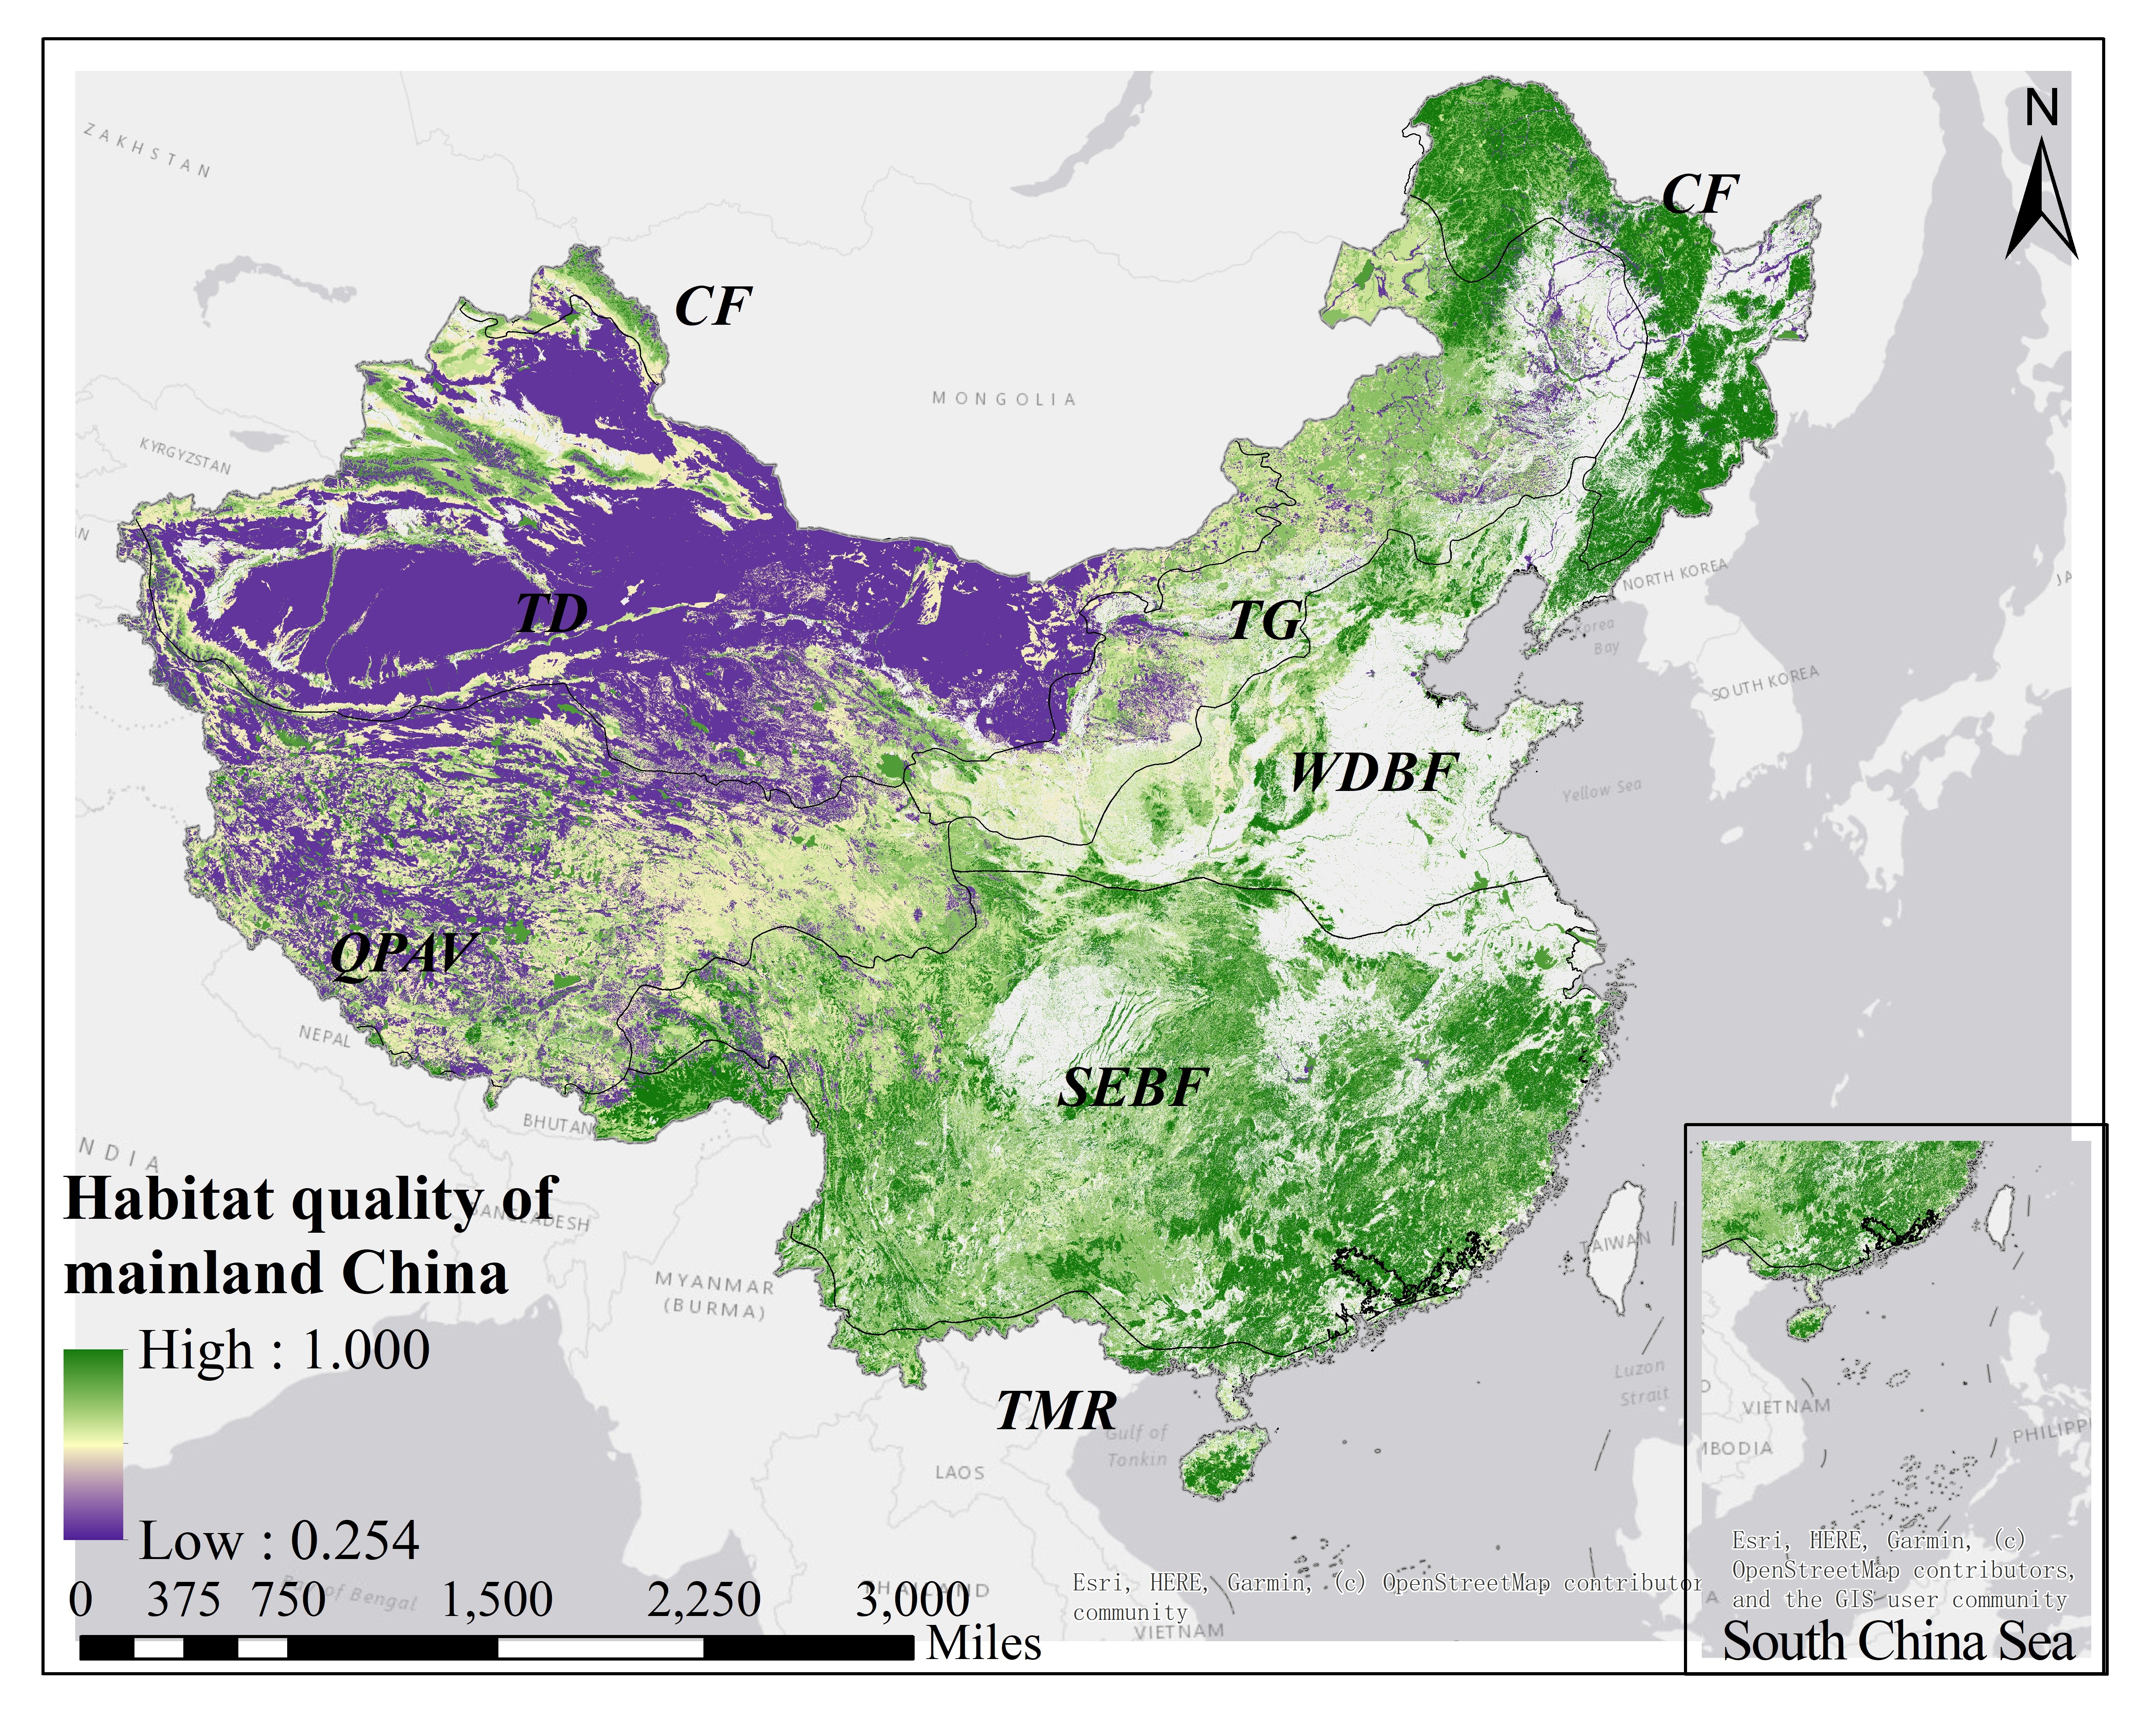

**Fig. S3.** Spatial patterns of habitat quality (HQ) across mainland China. Biomes: TMF—tropical monsoon forest, TCDBF—temperate coniferous & deciduous broadleaf forest, WDBF—warm-temperate deciduous broadleaf forest, CF—cold-temperate coniferous forest, SEBF—subtropical evergreen broadleaf forest, TD—temperate desert, TG—temperate grassland.

| **Table S11**  Area (million hectares) of Potential Climate Refugia across Mainland China under SSP2-4.5 and SSP5-8.5. | | | |
| --- | --- | --- | --- |
| Vegetation Zone | Area of Climate Refugia（ha） | | |
| Low-potential | Medium-potential | High-potential |
| SEBF | 6.81 | 103.13 | 15.93 |
| WDBF | 2.49 | 14.22 | 0 |
| QPAV | 10.59 | 5.85 | 0 |
| TMR | 0.63 | 10.78 | 1.01 |
| TG | 2.20 | 11.02 | 0 |
| TD | 3.13 | 3.65 | 0 |
| CF | 0.15 | 35.49 | 0 |
| Total | 26.01 | 184.15 | 16.94 |
| 227.10 | | |
